# Supplementary material for: Barriers to care and the need for dental educational materials for the Lowe syndrome community: a survey of dentists
Source: PeerJ. 2025 Oct 8;13:e20174. doi: 10.7717/peerj.20174 (PMC12515000; doi:10.7717/peerj.20174)
Supplement: Supplemental Information 1 [file peerj-13-20174-s001.xlsx]

## Sheet: Sheet1
Note: “Test run” data were deleted. One subject skipped the question about consenting to the survey; their data were deleted. 3 subjects stated that they did not consent; their data were deleted. One subject skipped the question about being in the US; their data were deleted. One subject said that they were not in the US; their data were deleted. This left us with a sample size of 73.
Descriptive statistics (frequencies and percentages):
Consent
		Frequency	Percent	Valid Percent	Cumulative Percent
Valid	1	73	100	100	100
Are you in the U.S. at the time of completing the survey?
		Frequency	Percent	Valid Percent	Cumulative Percent
Valid	1	73	100	100	100
Are you 18 years old or older?
		Frequency	Percent	Valid Percent	Cumulative Percent
Valid	1	73	100	100	100
What is your ethnicity?
		Frequency	Percent	Valid Percent	Cumulative Percent
Valid	1	4	5.5	5.5	5.5
	2	69	94.5	94.5	100
	Total	73	100	100
What is your race? - Selected Choice
		Frequency	Percent	Valid Percent	Cumulative Percent
Valid	1	58	79.5	79.5	79.5
	2	1	1.4	1.4	80.8
	3	1	1.4	1.4	82.2
	4	7	9.6	9.6	91.8
	6	6	8.2	8.2	100
	Total	73	100	100
What is your race? - Other: _________ - Text
		Frequency	Percent
Missing	System	73	100
What is your dental specialty?
		Frequency	Percent	Valid Percent	Cumulative Percent
Valid	2	42	57.5	60.9	60.9
	4	2	2.7	2.9	63.8
	5	5	6.8	7.2	71
	6	3	4.1	4.3	75.4
	8	8	11	11.6	87
	9	7	9.6	10.1	97.1
	10	2	2.7	2.9	100
	Total	69	94.5	100
Missing	System	4	5.5
Total		73	100
Where do you practice dentistry?
		Frequency	Percent	Valid Percent	Cumulative Percent
Valid	3	1	1.4	1.4	1.4
	5	2	2.7	2.9	4.3
	6	1	1.4	1.4	5.8
	9	3	4.1	4.3	10.1
	13	1	1.4	1.4	11.6
	14	1	1.4	1.4	13
	19	3	4.1	4.3	17.4
	20	1	1.4	1.4	18.8
	21	21	28.8	30.4	49.3
	23	1	1.4	1.4	50.7
	25	1	1.4	1.4	52.2
	26	1	1.4	1.4	53.6
	28	1	1.4	1.4	55.1
	29	4	5.5	5.8	60.9
	30	1	1.4	1.4	62.3
	32	9	12.3	13	75.4
	38	1	1.4	1.4	76.8
	39	2	2.7	2.9	79.7
	40	2	2.7	2.9	82.6
	43	2	2.7	2.9	85.5
	45	1	1.4	1.4	87
	46	3	4.1	4.3	91.3
	47	3	4.1	4.3	95.7
	51	3	4.1	4.3	100
	Total	69	94.5	100
Missing	System	4	5.5
Total		73	100
How many years of dental experience do you have, excluding student/resident experience?
		Frequency	Percent	Valid Percent	Cumulative Percent
Valid	1	5	6.8	7.4	7.4
	2	8	11	11.8	19.1
	3	5	6.8	7.4	26.5
	4	4	5.5	5.9	32.4
	5	46	63	67.6	100
	Total	68	93.2	100
Missing	System	5	6.8
Total		73	100
How many days per week do you currently see patients?
		Frequency	Percent	Valid Percent	Cumulative Percent
Valid	1	16	21.9	22.9	22.9
	2	3	4.1	4.3	27.1
	3	3	4.1	4.3	31.4
	4	6	8.2	8.6	40
	5	21	28.8	30	70
	6	20	27.4	28.6	98.6
	7	1	1.4	1.4	100
	Total	70	95.9	100
Missing	System	3	4.1
Total		73	100
How many patients do you currently see per week? - 1-20 patients
		Frequency	Percent	Valid Percent	Cumulative Percent
Valid	0	44	60.3	89.8	89.8
	1	5	6.8	10.2	100
	Total	49	67.1	100
Missing	System	24	32.9
Total		73	100
How many patients do you currently see per week? - 21-30 patients
		Frequency	Percent	Valid Percent	Cumulative Percent
Valid	0	40	54.8	81.6	81.6
	1	9	12.3	18.4	100
	Total	49	67.1	100
Missing	System	24	32.9
Total		73	100
How many patients do you currently see per week? - 31-40 patients
		Frequency	Percent	Valid Percent	Cumulative Percent
Valid	0	47	64.4	95.9	95.9
	1	2	2.7	4.1	100
	Total	49	67.1	100
Missing	System	24	32.9
Total		73	100
How many patients do you currently see per week? - 41-50 patients
		Frequency	Percent	Valid Percent	Cumulative Percent
Valid	0	40	54.8	81.6	81.6
	1	9	12.3	18.4	100
	Total	49	67.1	100
Missing	System	24	32.9
Total		73	100
How many patients do you currently see per week? - 51+ patients
		Frequency	Percent	Valid Percent	Cumulative Percent
Valid	0	25	34.2	51	51
	1	24	32.9	49	100
	Total	49	67.1	100
Missing	System	24	32.9
Total		73	100
Lowe syndrome is an uncommon condition that affects the brain, kidneys, and eyes and occurs almost exclusively in male individuals. What is your opinion regarding the ease or difficulty for a person with Lowe syndrome to locate a dentist?
		Frequency	Percent	Valid Percent	Cumulative Percent
Valid	1	2	2.7	8.3	8.3
	2	3	4.1	12.5	20.8
	3	8	11	33.3	54.2
	4	6	8.2	25	79.2
	5	5	6.8	20.8	100
	Total	24	32.9	100
Missing	System	49	67.1
Total		73	100
Which of the reasons below align with why you may not be able to treat a person with Lowe syndrome? (Select all that apply) - Selected Choice - Do not have experience in treating children with special needs
		Frequency	Percent	Valid Percent	Cumulative Percent
Valid	0	42	57.5	68.9	68.9
	1	19	26	31.1	100
	Total	61	83.6	100
Missing	System	12	16.4
Total		73	100
Which of the reasons below align with why you may not be able to treat a person with Lowe syndrome? (Select all that apply) - Selected Choice - Do not accept medical assistance, like Medicaid/Medicare
		Frequency	Percent	Valid Percent	Cumulative Percent
Valid	0	42	57.5	68.9	68.9
	1	19	26	31.1	100
	Total	61	83.6	100
Missing	System	12	16.4
Total		73	100
Which of the reasons below align with why you may not be able to treat a person with Lowe syndrome? (Select all that apply) - Selected Choice - Requires a multidisciplinary approach
		Frequency	Percent	Valid Percent	Cumulative Percent
Valid	0	50	68.5	82	82
	1	11	15.1	18	100
	Total	61	83.6	100
Missing	System	12	16.4
Total		73	100
Which of the reasons below align with why you may not be able to treat a person with Lowe syndrome? (Select all that apply) - Selected Choice - Dental office not properly equipped
		Frequency	Percent	Valid Percent	Cumulative Percent
Valid	0	50	68.5	82	82
	1	11	15.1	18	100
	Total	61	83.6	100
Missing	System	12	16.4
Total		73	100
Which of the reasons below align with why you may not be able to treat a person with Lowe syndrome? (Select all that apply) - Selected Choice - Other: Please explain _________
		Frequency	Percent	Valid Percent	Cumulative Percent
Valid	0	47	64.4	77	77
	1	14	19.2	23	100
	Total	61	83.6	100
Missing	System	12	16.4
Total		73	100
Which of the reasons below align with why you may not be able to treat a person with Lowe syndrome? (Select all that apply) - Selected Choice - None of the above reasons
		Frequency	Percent	Valid Percent	Cumulative Percent
Valid	0	46	63	75.4	75.4
	1	15	20.5	24.6	100
	Total	61	83.6	100
Missing	System	12	16.4
Total		73	100
Which of the reasons below align with why you may not be able to treat a person with Lowe syndrome? (Select all that apply) - Other: Please explain _________ - Text
		Frequency	Percent	Valid Percent	Cumulative Percent
Valid		59	80.8	80.8	80.8
	As a pediatric dentist, we treat all and refer to a hospital setting	1	1.4	1.4	82.2
	I am not aware of any of my patients having Lowe syndrome	1	1.4	1.4	83.6
	I have never heard of Lowe syndrome	1	1.4	1.4	84.9
	Never even heard of this...	1	1.4	1.4	86.3
	not currently practicing clinical dentistry - applying to OMR school	1	1.4	1.4	87.7
	Not familiar with Lowe syndrome	1	1.4	1.4	89
	office does not currently treat children	1	1.4	1.4	90.4
	Retired	2	2.7	2.7	93.2
	retired, but I would treat if I were still working	1	1.4	1.4	94.5
	This is the first time I ever hear of Lowe Syndrome	1	1.4	1.4	95.9
	unfamiliar with Lowe syndrome	1	1.4	1.4	97.3
	Unsure if any patients have been diagnosed with LS	1	1.4	1.4	98.6
	We do not treat children in our clinic	1	1.4	1.4	100
	Total	73	100	100
Do you treat any patients with special needs / intellectual and developmental disabilities (IDDs)? Approximately how many patients per week with IDDs?
		Frequency	Percent	Valid Percent	Cumulative Percent
Valid	1	21	28.8	34.4	34.4
	2	6	8.2	9.8	44.3
	3	2	2.7	3.3	47.5
	4	2	2.7	3.3	50.8
	5	8	11	13.1	63.9
	6	22	30.1	36.1	100
	Total	61	83.6	100
Missing	System	12	16.4
Total		73	100
In the next section of the survey, please provide your level of agreement with the following statements about potential educational materials to be given to patients with Lowe syndrome and their caregivers.I feel there is a need for more educational materials to help patients with Lowe syndrome in the dental setting.
		Frequency	Percent	Valid Percent	Cumulative Percent
Valid	1	25	34.2	43.1	43.1
	2	22	30.1	37.9	81
	3	11	15.1	19	100
	Total	58	79.5	100
Missing	System	15	20.5
Total		73	100
I feel there is a need for more educational materials to help patients with IDDs in general in the dental setting.
		Frequency	Percent	Valid Percent	Cumulative Percent
Valid	1	29	39.7	50	50
	2	20	27.4	34.5	84.5
	3	9	12.3	15.5	100
	Total	58	79.5	100
Missing	System	15	20.5
Total		73	100
I feel that the following types of educational materials would be helpful for individuals with Lowe syndrome. (Select all that apply) - Website/Mobile app
		Frequency	Percent	Valid Percent	Cumulative Percent
Valid	0	19	26	33.9	33.9
	1	37	50.7	66.1	100
	Total	56	76.7	100
Missing	System	17	23.3
Total		73	100
I feel that the following types of educational materials would be helpful for individuals with Lowe syndrome. (Select all that apply) - Introductory dental video
		Frequency	Percent	Valid Percent	Cumulative Percent
Valid	0	15	20.5	26.8	26.8
	1	41	56.2	73.2	100
	Total	56	76.7	100
Missing	System	17	23.3
Total		73	100
I feel that the following types of educational materials would be helpful for individuals with Lowe syndrome. (Select all that apply) - Pamphlets with oral hygiene instructions
		Frequency	Percent	Valid Percent	Cumulative Percent
Valid	0	16	21.9	28.6	28.6
	1	40	54.8	71.4	100
	Total	56	76.7	100
Missing	System	17	23.3
Total		73	100
I feel that the following types of educational materials would be helpful for individuals with Lowe syndrome. (Select all that apply) - Media channels (e.g., TikTok/Instagram/YouTube)
		Frequency	Percent	Valid Percent	Cumulative Percent
Valid	0	39	53.4	69.6	69.6
	1	17	23.3	30.4	100
	Total	56	76.7	100
Missing	System	17	23.3
Total		73	100
I feel that the following types of educational materials would be helpful for individuals with Lowe syndrome. (Select all that apply) - Podcasts featuring dental experts
		Frequency	Percent	Valid Percent	Cumulative Percent
Valid	0	37	50.7	66.1	66.1
	1	19	26	33.9	100
	Total	56	76.7	100
Missing	System	17	23.3
Total		73	100
I feel that the following types of educational materials would be helpful for individuals with Lowe syndrome. (Select all that apply) - Focus groups
		Frequency	Percent	Valid Percent	Cumulative Percent
Valid	0	40	54.8	71.4	71.4
	1	16	21.9	28.6	100
	Total	56	76.7	100
Missing	System	17	23.3
Total		73	100
I feel that it would be helpful to include a toothbrushing timer with a cartoon animation (similar to the Brush Hero phone app) on the Website/Mobile app.
		Frequency	Percent	Valid Percent	Cumulative Percent
Valid	1	16	21.9	29.1	29.1
	2	23	31.5	41.8	70.9
	3	6	8.2	10.9	81.8
	4	1	1.4	1.8	83.6
	6	9	12.3	16.4	100
	Total	55	75.3	100
Missing	System	18	24.7
Total		73	100
I feel that it would be helpful to include an access to care map/animation (similar to the ADAâ€™s Find A Dentist feature) on the website/mobile app.
		Frequency	Percent	Valid Percent	Cumulative Percent
Valid	1	24	32.9	42.9	42.9
	2	24	32.9	42.9	85.7
	3	4	5.5	7.1	92.9
	6	4	5.5	7.1	100
	Total	56	76.7	100
Missing	System	17	23.3
Total		73	100
I feel that it would be helpful to include a video showing the tell-show-do method on the website/mobile app.
		Frequency	Percent	Valid Percent	Cumulative Percent
Valid	1	22	30.1	39.3	39.3
	2	22	30.1	39.3	78.6
	3	9	12.3	16.1	94.6
	6	3	4.1	5.4	100
	Total	56	76.7	100
Missing	System	17	23.3
Total		73	100
I feel that video instructions would be helpful in simulating the dental experience for patients with Lowe syndrome.
		Frequency	Percent	Valid Percent	Cumulative Percent
Valid	1	18	24.7	32.1	32.1
	2	30	41.1	53.6	85.7
	3	8	11	14.3	100
	Total	56	76.7	100
Missing	System	17	23.3
Total		73	100
I feel that pamphlets answering frequently asked questions would be helpful for patients with Lowe syndrome.
		Frequency	Percent	Valid Percent	Cumulative Percent
Valid	1	25	34.2	45.5	45.5
	2	22	30.1	40	85.5
	3	7	9.6	12.7	98.2
	5	1	1.4	1.8	100
	Total	55	75.3	100
Missing	System	18	24.7
Total		73	100
Have you treated a patient with Lowe syndrome?
		Frequency	Percent	Valid Percent	Cumulative Percent
Valid	2	3	4.1	5.3	5.3
	3	54	74	94.7	100
	Total	57	78.1	100
Missing	System	16	21.9
Total		73	100
Approximately how many patients with Lowe syndrome have you treated in the last 6 months?
		Frequency	Percent	Valid Percent	Cumulative Percent
Valid	1	2	2.7	100	100
Missing	System	71	97.3
Total		73	100
Which of the following dental treatments have you completed on a patient with Lowe syndrome? (Select all that apply) - Selected Choice - Emergency dental treatment
		Frequency	Percent	Valid Percent	Cumulative Percent
Valid	0	2	2.7	100	100
Missing	System	71	97.3
Total		73	100
Which of the following dental treatments have you completed on a patient with Lowe syndrome? (Select all that apply) - Selected Choice - 6-month examinations
		Frequency	Percent	Valid Percent	Cumulative Percent
Valid	1	2	2.7	100	100
Missing	System	71	97.3
Total		73	100
Which of the following dental treatments have you completed on a patient with Lowe syndrome? (Select all that apply) - Selected Choice - Prophylaxis
		Frequency	Percent	Valid Percent	Cumulative Percent
Valid	0	1	1.4	50	50
	1	1	1.4	50	100
	Total	2	2.7	100
Missing	System	71	97.3
Total		73	100
Which of the following dental treatments have you completed on a patient with Lowe syndrome? (Select all that apply) - Selected Choice - Restorative treatment
		Frequency	Percent	Valid Percent	Cumulative Percent
Valid	0	2	2.7	100	100
Missing	System	71	97.3
Total		73	100
Which of the following dental treatments have you completed on a patient with Lowe syndrome? (Select all that apply) - Selected Choice - Extractions
		Frequency	Percent	Valid Percent	Cumulative Percent
Valid	0	2	2.7	100	100
Missing	System	71	97.3
Total		73	100
Which of the following dental treatments have you completed on a patient with Lowe syndrome? (Select all that apply) - Selected Choice - Orthodontic treatment
		Frequency	Percent	Valid Percent	Cumulative Percent
Valid	0	2	2.7	100	100
Missing	System	71	97.3
Total		73	100
Which of the following dental treatments have you completed on a patient with Lowe syndrome? (Select all that apply) - Selected Choice - Endodontic treatment
		Frequency	Percent	Valid Percent	Cumulative Percent
Valid	0	2	2.7	100	100
Missing	System	71	97.3
Total		73	100
Which of the following dental treatments have you completed on a patient with Lowe syndrome? (Select all that apply) - Selected Choice - Other: Please explain _______
		Frequency	Percent	Valid Percent	Cumulative Percent
Valid	0	2	2.7	100	100
Missing	System	71	97.3
Total		73	100
Which of the following dental treatments have you completed on a patient with Lowe syndrome? (Select all that apply) - Other: Please explain _______ - Text
		Frequency	Percent
Missing	System	73	100
Have you treated an individual with Lowe syndrome with nitrous oxide for one or more dental appointments?
		Frequency	Percent	Valid Percent	Cumulative Percent
Valid	2	2	2.7	100	100
Missing	System	71	97.3
Total		73	100
Have you treated an individual with Lowe syndrome with oral sedation for one or more dental appointments?
		Frequency	Percent	Valid Percent	Cumulative Percent
Valid	2	2	2.7	100	100
Missing	System	71	97.3
Total		73	100
Have you treated an individual with Lowe syndrome with general anesthesia for one or more dental appointments?
		Frequency	Percent	Valid Percent	Cumulative Percent
Valid	2	2	2.7	100	100
Missing	System	71	97.3
Total		73	100
For the next 2 questions, choose the answer that best applies to the patient with Lowe syndrome that you saw most recently.How accepting of dental treatment was the patient?
		Frequency	Percent	Valid Percent	Cumulative Percent
Valid	2	1	1.4	50	50
	3	1	1.4	50	100
	Total	2	2.7	100
Missing	System	71	97.3
Total		73	100
At the most recent dental visit, which of the following dental conditions did the patient with Lowe syndrome have? (Select all that apply) - Caries
		Frequency	Percent	Valid Percent	Cumulative Percent
Valid	0	2	2.7	100	100
Missing	System	71	97.3
Total		73	100
At the most recent dental visit, which of the following dental conditions did the patient with Lowe syndrome have? (Select all that apply) - Trauma
		Frequency	Percent	Valid Percent	Cumulative Percent
Valid	0	2	2.7	100	100
Missing	System	71	97.3
Total		73	100
At the most recent dental visit, which of the following dental conditions did the patient with Lowe syndrome have? (Select all that apply) - Non-Restorable teeth
		Frequency	Percent	Valid Percent	Cumulative Percent
Valid	0	2	2.7	100	100
Missing	System	71	97.3
Total		73	100
At the most recent dental visit, which of the following dental conditions did the patient with Lowe syndrome have? (Select all that apply) - Gingivitis
		Frequency	Percent	Valid Percent	Cumulative Percent
Valid	0	1	1.4	50	50
	1	1	1.4	50	100
	Total	2	2.7	100
Missing	System	71	97.3
Total		73	100
At the most recent dental visit, which of the following dental conditions did the patient with Lowe syndrome have? (Select all that apply) - Periodontitis
		Frequency	Percent	Valid Percent	Cumulative Percent
Valid	0	2	2.7	100	100
Missing	System	71	97.3
Total		73	100
At the most recent dental visit, which of the following dental conditions did the patient with Lowe syndrome have? (Select all that apply) - Malocclusion
		Frequency	Percent	Valid Percent	Cumulative Percent
Valid	0	2	2.7	100	100
Missing	System	71	97.3
Total		73	100
At the most recent dental visit, which of the following dental conditions did the patient with Lowe syndrome have? (Select all that apply) - Canker sores
		Frequency	Percent	Valid Percent	Cumulative Percent
Valid	0	2	2.7	100	100
Missing	System	71	97.3
Total		73	100
At the most recent dental visit, which of the following dental conditions did the patient with Lowe syndrome have? (Select all that apply) - Halitosis
		Frequency	Percent	Valid Percent	Cumulative Percent
Valid	0	2	2.7	100	100
Missing	System	71	97.3
Total		73	100
At the most recent dental visit, which of the following dental conditions did the patient with Lowe syndrome have? (Select all that apply) - I cannot recall
		Frequency	Percent	Valid Percent	Cumulative Percent
Valid	0	2	2.7	100	100
Missing	System	71	97.3
Total		73	100
At the most recent dental visit, which of the following dental conditions did the patient with Lowe syndrome have? (Select all that apply) - None of the above
		Frequency	Percent	Valid Percent	Cumulative Percent
Valid	0	1	1.4	50	50
	1	1	1.4	50	100
	Total	2	2.7	100
Missing	System	71	97.3
Total		73	100
Associations:
We wanted to compare the specialties, but only the “general dentist” category had a big enough sample size. So we compared general dentists vs. specialists. In the variable below, 0=general dentist and 1=specialist.
Specialist
		Frequency	Percent	Valid Percent	Cumulative Percent
Valid	0	42	57.5	60.9	60.9
	1	27	37	39.1	100
	Total	69	94.5	100
Missing	System	4	5.5
Total		73	100
Associations between “specialist” and each part of Q15 (chi-square test):
Crosstab
			I feel that the following types of educational materials would be helpful for individuals with Lowe syndrome. (Select all that apply) - Website/Mobile app		Total
			0	1
Specialist	0	Count	9	23	32
		% within Specialist	0.281	0.719	1
	1	Count	10	14	24
		% within Specialist	0.417	0.583	1
Total		Count	19	37	56
		% within Specialist	0.339	0.661	1
Chi-Square Tests
	Value	df	Asymptotic Significance (2-sided)	Exact Sig. (2-sided)	Exact Sig. (1-sided)
Pearson Chi-Square	1.122a	1	0.29
Continuity Correctionb	0.599	1	0.439
Likelihood Ratio	1.117	1	0.291
Fisher's Exact Test				0.394	0.219
Linear-by-Linear Association	1.102	1	0.294
N of Valid Cases	56
a. 0 cells (0.0%) have expected count less than 5. The minimum expected count is 8.14.
b. Computed only for a 2x2 table
Crosstab
			I feel that the following types of educational materials would be helpful for individuals with Lowe syndrome. (Select all that apply) - Introductory dental video		Total
			0	1
Specialist	0	Count	10	22	32
		% within Specialist	0.313	0.688	1
	1	Count	5	19	24
		% within Specialist	0.208	0.792	1
Total		Count	15	41	56
		% within Specialist	0.268	0.732	1
Chi-Square Tests
	Value	df	Asymptotic Significance (2-sided)	Exact Sig. (2-sided)	Exact Sig. (1-sided)
Pearson Chi-Square	.759a	1	0.384
Continuity Correctionb	0.321	1	0.571
Likelihood Ratio	0.772	1	0.38
Fisher's Exact Test				0.544	0.288
Linear-by-Linear Association	0.745	1	0.388
N of Valid Cases	56
a. 0 cells (0.0%) have expected count less than 5. The minimum expected count is 6.43.
b. Computed only for a 2x2 table
Crosstab
			I feel that the following types of educational materials would be helpful for individuals with Lowe syndrome. (Select all that apply) - Pamphlets with oral hygiene instructions		Total
			0	1
Specialist	0	Count	9	23	32
		% within Specialist	0.281	0.719	1
	1	Count	7	17	24
		% within Specialist	0.292	0.708	1
Total		Count	16	40	56
		% within Specialist	0.286	0.714	1
Chi-Square Tests
	Value	df	Asymptotic Significance (2-sided)	Exact Sig. (2-sided)	Exact Sig. (1-sided)
Pearson Chi-Square	.007a	1	0.932
Continuity Correctionb	0	1	1
Likelihood Ratio	0.007	1	0.932
Fisher's Exact Test				1	0.582
Linear-by-Linear Association	0.007	1	0.933
N of Valid Cases	56
a. 0 cells (0.0%) have expected count less than 5. The minimum expected count is 6.86.
b. Computed only for a 2x2 table
Crosstab
			I feel that the following types of educational materials would be helpful for individuals with Lowe syndrome. (Select all that apply) - Media channels (e.g., TikTok/Instagram/YouTube)		Total
			0	1
Specialist	0	Count	24	8	32
		% within Specialist	0.75	0.25	1
	1	Count	15	9	24
		% within Specialist	0.625	0.375	1
Total		Count	39	17	56
		% within Specialist	0.696	0.304	1
Chi-Square Tests
	Value	df	Asymptotic Significance (2-sided)	Exact Sig. (2-sided)	Exact Sig. (1-sided)
Pearson Chi-Square	1.014a	1	0.314
Continuity Correctionb	0.509	1	0.476
Likelihood Ratio	1.008	1	0.315
Fisher's Exact Test				0.384	0.237
Linear-by-Linear Association	0.995	1	0.318
N of Valid Cases	56
a. 0 cells (0.0%) have expected count less than 5. The minimum expected count is 7.29.
b. Computed only for a 2x2 table
Crosstab
			I feel that the following types of educational materials would be helpful for individuals with Lowe syndrome. (Select all that apply) - Podcasts featuring dental experts		Total
			0	1
Specialist	0	Count	24	8	32
		% within Specialist	0.75	0.25	1
	1	Count	13	11	24
		% within Specialist	0.542	0.458	1
Total		Count	37	19	56
		% within Specialist	0.661	0.339	1
Chi-Square Tests
	Value	df	Asymptotic Significance (2-sided)	Exact Sig. (2-sided)	Exact Sig. (1-sided)
Pearson Chi-Square	2.655a	1	0.103
Continuity Correctionb	1.807	1	0.179
Likelihood Ratio	2.649	1	0.104
Fisher's Exact Test				0.154	0.09
Linear-by-Linear Association	2.608	1	0.106
N of Valid Cases	56
a. 0 cells (0.0%) have expected count less than 5. The minimum expected count is 8.14.
b. Computed only for a 2x2 table
Crosstab
			I feel that the following types of educational materials would be helpful for individuals with Lowe syndrome. (Select all that apply) - Focus groups		Total
			0	1
Specialist	0	Count	23	9	32
		% within Specialist	0.719	0.281	1
	1	Count	17	7	24
		% within Specialist	0.708	0.292	1
Total		Count	40	16	56
		% within Specialist	0.714	0.286	1
Chi-Square Tests
	Value	df	Asymptotic Significance (2-sided)	Exact Sig. (2-sided)	Exact Sig. (1-sided)
Pearson Chi-Square	.007a	1	0.932
Continuity Correctionb	0	1	1
Likelihood Ratio	0.007	1	0.932
Fisher's Exact Test				1	0.582
Linear-by-Linear Association	0.007	1	0.933
N of Valid Cases	56
a. 0 cells (0.0%) have expected count less than 5. The minimum expected count is 6.86.
b. Computed only for a 2x2 table
Association between “specialist” and Q13 (Mann-Whitney U test):
Specialist * In the next section of the survey, please provide your level of agreement with the following statements about potential educational materials to be given to patients with Lowe syndrome and their caregivers.I feel there is a need for more educational materials to help patients with Lowe syndrome in the dental setting. Crosstabulation
			In the next section of the survey, please provide your level of agreement with the following statements about potential educational materials to be given to patients with Lowe syndrome and their caregivers.I feel there is a need for more educational materials to help patients with Lowe syndrome in the dental setting.			Total
			1	2	3
Specialist	0	Count	17	9	8	34
		% within Specialist	0.5	0.265	0.235	1
	1	Count	8	13	3	24
		% within Specialist	0.333	0.542	0.125	1
Total		Count	25	22	11	58
		% within Specialist	0.431	0.379	0.19	1
Ranks
	Specialist	N	Mean Rank	Sum of Ranks
In the next section of the survey, please provide your level of agreement with the following statements about potential educational materials to be given to patients with Lowe syndrome and their caregivers.I feel there is a need for more educational materials to help patients with Lowe syndrome in the dental setting.	0	34	28.63	973.5
	1	24	30.73	737.5
	Total	58
Test Statisticsa
	In the next section of the survey, please provide your level of agreement with the following statements about potential educational materials to be given to patients with Lowe syndrome and their caregivers.I feel there is a need for more educational materials to help patients with Lowe syndrome in the dental setting.
Mann-Whitney U	378.5
Wilcoxon W	973.5
Z	-0.503
Asymp. Sig. (2-tailed)	0.615
a. Grouping Variable: Specialist
Association between “specialist” and Q14 (Mann-Whitney U test):
Specialist * I feel there is a need for more educational materials to help patients with IDDs in general in the dental setting. Crosstabulation
			I feel there is a need for more educational materials to help patients with IDDs in general in the dental setting.			Total
			1	2	3
Specialist	0	Count	17	11	6	34
		% within Specialist	0.5	0.324	0.176	1
	1	Count	12	9	3	24
		% within Specialist	0.5	0.375	0.125	1
Total		Count	29	20	9	58
		% within Specialist	0.5	0.345	0.155	1
Ranks
	Specialist	N	Mean Rank	Sum of Ranks
I feel there is a need for more educational materials to help patients with IDDs in general in the dental setting.	0	34	29.81	1013.5
	1	24	29.06	697.5
	Total	58
Test Statisticsa
	I feel there is a need for more educational materials to help patients with IDDs in general in the dental setting.
Mann-Whitney U	397.5
Wilcoxon W	697.5
Z	-0.182
Asymp. Sig. (2-tailed)	0.856
a. Grouping Variable: Specialist
Association between “specialist” and Q16 (Mann-Whitney U test [those who answered “I am not aware of this feature” (option 6) for Q16 were excluded from the test]):
Specialist * I feel that it would be helpful to include a toothbrushing timer with a cartoon animation (similar to the Brush Hero phone app) on the Website/Mobile app. Crosstabulation
			I feel that it would be helpful to include a toothbrushing timer with a cartoon animation (similar to the Brush Hero phone app) on the Website/Mobile app.					Total
			1	2	3	4	6
Specialist	0	Count	11	10	4	1	7	33
		% within Specialist	0.333	0.303	0.121	0.03	0.212	1
	1	Count	5	13	2	0	2	22
		% within Specialist	0.227	0.591	0.091	0	0.091	1
Total		Count	16	23	6	1	9	55
		% within Specialist	0.291	0.418	0.109	0.018	0.164	1
Ranks
	Specialist	N	Mean Rank	Sum of Ranks
I feel that it would be helpful to include a toothbrushing timer with a cartoon animation (similar to the Brush Hero phone app) on the Website/Mobile app.	0	26	22.67	589.5
	1	20	24.58	491.5
	Total	46
Test Statisticsa
	I feel that it would be helpful to include a toothbrushing timer with a cartoon animation (similar to the Brush Hero phone app) on the Website/Mobile app.
Mann-Whitney U	238.5
Wilcoxon W	589.5
Z	-0.523
Asymp. Sig. (2-tailed)	0.601
a. Grouping Variable: Specialist
Association between “specialist” and Q17 (Mann-Whitney U test [those who answered “I am not aware of this feature” (option 6) for Q17 were excluded from the test]):
Specialist * I feel that it would be helpful to include an access to care map/animation (similar to the ADAâ€™s Find A Dentist feature) on the website/mobile app. Crosstabulation
			I feel that it would be helpful to include an access to care map/animation (similar to the ADAâ€™s Find A Dentist feature) on the website/mobile app.				Total
			1	2	3	6
Specialist	0	Count	16	14	1	3	34
		% within Specialist	0.471	0.412	0.029	0.088	1
	1	Count	8	10	3	1	22
		% within Specialist	0.364	0.455	0.136	0.045	1
Total		Count	24	24	4	4	56
		% within Specialist	0.429	0.429	0.071	0.071	1
Ranks
	Specialist	N	Mean Rank	Sum of Ranks
I feel that it would be helpful to include an access to care map/animation (similar to the ADAâ€™s Find A Dentist feature) on the website/mobile app.	0	31	24.56	761.5
	1	21	29.36	616.5
	Total	52
Test Statisticsa
	I feel that it would be helpful to include an access to care map/animation (similar to the ADAâ€™s Find A Dentist feature) on the website/mobile app.
Mann-Whitney U	265.5
Wilcoxon W	761.5
Z	-1.249
Asymp. Sig. (2-tailed)	0.212
a. Grouping Variable: Specialist
Association between “specialist” and Q18 (Mann-Whitney U test [those who answered “I am not aware of this method” (option 6) for Q18 were excluded from the test]):
Specialist * I feel that it would be helpful to include a video showing the tell-show-do method on the website/mobile app. Crosstabulation
			I feel that it would be helpful to include a video showing the tell-show-do method on the website/mobile app.				Total
			1	2	3	6
Specialist	0	Count	14	11	8	1	34
		% within Specialist	0.412	0.324	0.235	0.029	1
	1	Count	8	11	1	2	22
		% within Specialist	0.364	0.5	0.045	0.091	1
Total		Count	22	22	9	3	56
		% within Specialist	0.393	0.393	0.161	0.054	1
Ranks
	Specialist	N	Mean Rank	Sum of Ranks
I feel that it would be helpful to include a video showing the tell-show-do method on the website/mobile app.	0	33	27.92	921.5
	1	20	25.48	509.5
	Total	53
Test Statisticsa
	I feel that it would be helpful to include a video showing the tell-show-do method on the website/mobile app.
Mann-Whitney U	299.5
Wilcoxon W	509.5
Z	-0.606
Asymp. Sig. (2-tailed)	0.544
a. Grouping Variable: Specialist
Association between “specialist” and Q19 (Mann-Whitney U test):
Specialist * I feel that video instructions would be helpful in simulating the dental experience for patients with Lowe syndrome. Crosstabulation
			I feel that video instructions would be helpful in simulating the dental experience for patients with Lowe syndrome.			Total
			1	2	3
Specialist	0	Count	12	15	7	34
		% within Specialist	0.353	0.441	0.206	1
	1	Count	6	15	1	22
		% within Specialist	0.273	0.682	0.045	1
Total		Count	18	30	8	56
		% within Specialist	0.321	0.536	0.143	1
Ranks
	Specialist	N	Mean Rank	Sum of Ranks
I feel that video instructions would be helpful in simulating the dental experience for patients with Lowe syndrome.	0	34	28.94	984
	1	22	27.82	612
	Total	56
Test Statisticsa
	I feel that video instructions would be helpful in simulating the dental experience for patients with Lowe syndrome.
Mann-Whitney U	359
Wilcoxon W	612
Z	-0.28
Asymp. Sig. (2-tailed)	0.78
a. Grouping Variable: Specialist
Association between “specialist” and Q20 (Mann-Whitney U test):
Specialist * I feel that pamphlets answering frequently asked questions would be helpful for patients with Lowe syndrome. Crosstabulation
			I feel that pamphlets answering frequently asked questions would be helpful for patients with Lowe syndrome.				Total
			1	2	3	5
Specialist	0	Count	18	9	6	1	34
		% within Specialist	0.529	0.265	0.176	0.029	1
	1	Count	7	13	1	0	21
		% within Specialist	0.333	0.619	0.048	0	1
Total		Count	25	22	7	1	55
		% within Specialist	0.455	0.4	0.127	0.018	1
Ranks
	Specialist	N	Mean Rank	Sum of Ranks
I feel that pamphlets answering frequently asked questions would be helpful for patients with Lowe syndrome.	0	34	27.16	923.5
	1	21	29.36	616.5
	Total	55
Test Statisticsa
	I feel that pamphlets answering frequently asked questions would be helpful for patients with Lowe syndrome.
Mann-Whitney U	328.5
Wilcoxon W	923.5
Z	-0.539
Asymp. Sig. (2-tailed)	0.59
a. Grouping Variable: Specialist
We wanted to compare categories based on years of dental experience, but only the “21+” category had a big enough sample size. So we compared “20 and under” vs. “21+”. In the variable below, 0 = “20 and under” and 1 = “21+”.
Over_20_Years_Dental_Experience
		Frequency	Percent	Valid Percent	Cumulative Percent
Valid	0	22	30.1	32.4	32.4
	1	46	63	67.6	100
	Total	68	93.2	100
Missing	System	5	6.8
Total		73	100
Associations between “21+ years of dental experience” and each part of Q15 (chi-square test or Fisher’s exact test):
Crosstab
			I feel that the following types of educational materials would be helpful for individuals with Lowe syndrome. (Select all that apply) - Website/Mobile app		Total
			0	1
Over_20_Years_Dental_Experience	0	Count	6	11	17
		% within Over_20_Years_Dental_Experience	0.353	0.647	1
	1	Count	13	25	38
		% within Over_20_Years_Dental_Experience	0.342	0.658	1
Total		Count	19	36	55
		% within Over_20_Years_Dental_Experience	0.345	0.655	1
Chi-Square Tests
	Value	df	Asymptotic Significance (2-sided)	Exact Sig. (2-sided)	Exact Sig. (1-sided)
Pearson Chi-Square	.006a	1	0.938
Continuity Correctionb	0	1	1
Likelihood Ratio	0.006	1	0.938
Fisher's Exact Test				1	0.585
Linear-by-Linear Association	0.006	1	0.938
N of Valid Cases	55
a. 0 cells (0.0%) have expected count less than 5. The minimum expected count is 5.87.
b. Computed only for a 2x2 table
Crosstab
			I feel that the following types of educational materials would be helpful for individuals with Lowe syndrome. (Select all that apply) - Introductory dental video		Total
			0	1
Over_20_Years_Dental_Experience	0	Count	3	14	17
		% within Over_20_Years_Dental_Experience	0.176	0.824	1
	1	Count	12	26	38
		% within Over_20_Years_Dental_Experience	0.316	0.684	1
Total		Count	15	40	55
		% within Over_20_Years_Dental_Experience	0.273	0.727	1
Chi-Square Tests
	Value	df	Asymptotic Significance (2-sided)	Exact Sig. (2-sided)	Exact Sig. (1-sided)
Pearson Chi-Square	1.149a	1	0.284
Continuity Correctionb	0.554	1	0.457
Likelihood Ratio	1.213	1	0.271
Fisher's Exact Test				0.344	0.232
Linear-by-Linear Association	1.128	1	0.288
N of Valid Cases	55
a. 1 cells (25.0%) have expected count less than 5. The minimum expected count is 4.64.
b. Computed only for a 2x2 table
Crosstab
			I feel that the following types of educational materials would be helpful for individuals with Lowe syndrome. (Select all that apply) - Pamphlets with oral hygiene instructions		Total
			0	1
Over_20_Years_Dental_Experience	0	Count	4	13	17
		% within Over_20_Years_Dental_Experience	0.235	0.765	1
	1	Count	12	26	38
		% within Over_20_Years_Dental_Experience	0.316	0.684	1
Total		Count	16	39	55
		% within Over_20_Years_Dental_Experience	0.291	0.709	1
Chi-Square Tests
	Value	df	Asymptotic Significance (2-sided)	Exact Sig. (2-sided)	Exact Sig. (1-sided)
Pearson Chi-Square	.369a	1	0.544
Continuity Correctionb	0.082	1	0.775
Likelihood Ratio	0.378	1	0.539
Fisher's Exact Test				0.75	0.394
Linear-by-Linear Association	0.362	1	0.547
N of Valid Cases	55
a. 1 cells (25.0%) have expected count less than 5. The minimum expected count is 4.95.
b. Computed only for a 2x2 table
Crosstab
			I feel that the following types of educational materials would be helpful for individuals with Lowe syndrome. (Select all that apply) - Media channels (e.g., TikTok/Instagram/YouTube)		Total
			0	1
Over_20_Years_Dental_Experience	0	Count	8	9	17
		% within Over_20_Years_Dental_Experience	0.471	0.529	1
	1	Count	30	8	38
		% within Over_20_Years_Dental_Experience	0.789	0.211	1
Total		Count	38	17	55
		% within Over_20_Years_Dental_Experience	0.691	0.309	1
Chi-Square Tests
	Value	df	Asymptotic Significance (2-sided)	Exact Sig. (2-sided)	Exact Sig. (1-sided)
Pearson Chi-Square	5.593a	1	0.018
Continuity Correctionb	4.199	1	0.04
Likelihood Ratio	5.399	1	0.02
Fisher's Exact Test				0.028	0.022
Linear-by-Linear Association	5.491	1	0.019
N of Valid Cases	55
a. 0 cells (0.0%) have expected count less than 5. The minimum expected count is 5.25.
b. Computed only for a 2x2 table
Crosstab
			I feel that the following types of educational materials would be helpful for individuals with Lowe syndrome. (Select all that apply) - Podcasts featuring dental experts		Total
			0	1
Over_20_Years_Dental_Experience	0	Count	11	6	17
		% within Over_20_Years_Dental_Experience	0.647	0.353	1
	1	Count	25	13	38
		% within Over_20_Years_Dental_Experience	0.658	0.342	1
Total		Count	36	19	55
		% within Over_20_Years_Dental_Experience	0.655	0.345	1
Chi-Square Tests
	Value	df	Asymptotic Significance (2-sided)	Exact Sig. (2-sided)	Exact Sig. (1-sided)
Pearson Chi-Square	.006a	1	0.938
Continuity Correctionb	0	1	1
Likelihood Ratio	0.006	1	0.938
Fisher's Exact Test				1	0.585
Linear-by-Linear Association	0.006	1	0.938
N of Valid Cases	55
a. 0 cells (0.0%) have expected count less than 5. The minimum expected count is 5.87.
b. Computed only for a 2x2 table
Crosstab
			I feel that the following types of educational materials would be helpful for individuals with Lowe syndrome. (Select all that apply) - Focus groups		Total
			0	1
Over_20_Years_Dental_Experience	0	Count	12	5	17
		% within Over_20_Years_Dental_Experience	0.706	0.294	1
	1	Count	27	11	38
		% within Over_20_Years_Dental_Experience	0.711	0.289	1
Total		Count	39	16	55
		% within Over_20_Years_Dental_Experience	0.709	0.291	1
Chi-Square Tests
	Value	df	Asymptotic Significance (2-sided)	Exact Sig. (2-sided)	Exact Sig. (1-sided)
Pearson Chi-Square	.001a	1	0.972
Continuity Correctionb	0	1	1
Likelihood Ratio	0.001	1	0.972
Fisher's Exact Test				1	0.606
Linear-by-Linear Association	0.001	1	0.972
N of Valid Cases	55
a. 1 cells (25.0%) have expected count less than 5. The minimum expected count is 4.95.
b. Computed only for a 2x2 table
Association between “21+ years of dental experience” and Q13 (Mann-Whitney U test):
Over_20_Years_Dental_Experience * In the next section of the survey, please provide your level of agreement with the following statements about potential educational materials to be given to patients with Lowe syndrome and their caregivers.I feel there is a need for more educational materials to help patients with Lowe syndrome in the dental setting. Crosstabulation
			In the next section of the survey, please provide your level of agreement with the following statements about potential educational materials to be given to patients with Lowe syndrome and their caregivers.I feel there is a need for more educational materials to help patients with Lowe syndrome in the dental setting.			Total
			1	2	3
Over_20_Years_Dental_Experience	0	Count	7	10	2	19
		% within Over_20_Years_Dental_Experience	0.368	0.526	0.105	1
	1	Count	18	11	9	38
		% within Over_20_Years_Dental_Experience	0.474	0.289	0.237	1
Total		Count	25	21	11	57
		% within Over_20_Years_Dental_Experience	0.439	0.368	0.193	1
Ranks
	Over_20_Years_Dental_Experience	N	Mean Rank	Sum of Ranks
In the next section of the survey, please provide your level of agreement with the following statements about potential educational materials to be given to patients with Lowe syndrome and their caregivers.I feel there is a need for more educational materials to help patients with Lowe syndrome in the dental setting.	0	19	29.21	555
	1	38	28.89	1098
	Total	57
Test Statisticsa
	In the next section of the survey, please provide your level of agreement with the following statements about potential educational materials to be given to patients with Lowe syndrome and their caregivers.I feel there is a need for more educational materials to help patients with Lowe syndrome in the dental setting.
Mann-Whitney U	357
Wilcoxon W	1098
Z	-0.073
Asymp. Sig. (2-tailed)	0.942
a. Grouping Variable: Over_20_Years_Dental_Experience
Association between “21+ years of dental experience” and Q14 (Mann-Whitney U test):
Over_20_Years_Dental_Experience * I feel there is a need for more educational materials to help patients with IDDs in general in the dental setting. Crosstabulation
			I feel there is a need for more educational materials to help patients with IDDs in general in the dental setting.			Total
			1	2	3
Over_20_Years_Dental_Experience	0	Count	11	8	0	19
		% within Over_20_Years_Dental_Experience	0.579	0.421	0	1
	1	Count	18	12	8	38
		% within Over_20_Years_Dental_Experience	0.474	0.316	0.211	1
Total		Count	29	20	8	57
		% within Over_20_Years_Dental_Experience	0.509	0.351	0.14	1
Ranks
	Over_20_Years_Dental_Experience	N	Mean Rank	Sum of Ranks
I feel there is a need for more educational materials to help patients with IDDs in general in the dental setting.	0	19	25.32	481
	1	38	30.84	1172
	Total	57
Test Statisticsa
	I feel there is a need for more educational materials to help patients with IDDs in general in the dental setting.
Mann-Whitney U	291
Wilcoxon W	481
Z	-1.307
Asymp. Sig. (2-tailed)	0.191
a. Grouping Variable: Over_20_Years_Dental_Experience
Association between “21+ years of dental experience” and Q16 (Mann-Whitney U test [those who answered “I am not aware of this feature” (option 6) for Q16 were excluded from the test]):
Over_20_Years_Dental_Experience * I feel that it would be helpful to include a toothbrushing timer with a cartoon animation (similar to the Brush Hero phone app) on the Website/Mobile app. Crosstabulation
			I feel that it would be helpful to include a toothbrushing timer with a cartoon animation (similar to the Brush Hero phone app) on the Website/Mobile app.					Total
			1	2	3	4	6
Over_20_Years_Dental_Experience	0	Count	4	10	1	0	2	17
		% within Over_20_Years_Dental_Experience	0.235	0.588	0.059	0	0.118	1
	1	Count	12	12	5	1	7	37
		% within Over_20_Years_Dental_Experience	0.324	0.324	0.135	0.027	0.189	1
Total		Count	16	22	6	1	9	54
		% within Over_20_Years_Dental_Experience	0.296	0.407	0.111	0.019	0.167	1
Ranks
	Over_20_Years_Dental_Experience	N	Mean Rank	Sum of Ranks
I feel that it would be helpful to include a toothbrushing timer with a cartoon animation (similar to the Brush Hero phone app) on the Website/Mobile app.	0	15	23.37	350.5
	1	30	22.82	684.5
	Total	45
Test Statisticsa
	I feel that it would be helpful to include a toothbrushing timer with a cartoon animation (similar to the Brush Hero phone app) on the Website/Mobile app.
Mann-Whitney U	219.5
Wilcoxon W	684.5
Z	-0.145
Asymp. Sig. (2-tailed)	0.885
a. Grouping Variable: Over_20_Years_Dental_Experience
Association between “21+ years of dental experience” and Q17 (Mann-Whitney U test [those who answered “I am not aware of this feature” (option 6) for Q17 were excluded from the test]):
Over_20_Years_Dental_Experience * I feel that it would be helpful to include an access to care map/animation (similar to the ADAâ€™s Find A Dentist feature) on the website/mobile app. Crosstabulation
			I feel that it would be helpful to include an access to care map/animation (similar to the ADAâ€™s Find A Dentist feature) on the website/mobile app.				Total
			1	2	3	6
Over_20_Years_Dental_Experience	0	Count	5	11	1	1	18
		% within Over_20_Years_Dental_Experience	0.278	0.611	0.056	0.056	1
	1	Count	19	12	3	3	37
		% within Over_20_Years_Dental_Experience	0.514	0.324	0.081	0.081	1
Total		Count	24	23	4	4	55
		% within Over_20_Years_Dental_Experience	0.436	0.418	0.073	0.073	1
Ranks
	Over_20_Years_Dental_Experience	N	Mean Rank	Sum of Ranks
I feel that it would be helpful to include an access to care map/animation (similar to the ADAâ€™s Find A Dentist feature) on the website/mobile app.	0	17	29.88	508
	1	34	24.06	818
	Total	51
Test Statisticsa
	I feel that it would be helpful to include an access to care map/animation (similar to the ADAâ€™s Find A Dentist feature) on the website/mobile app.
Mann-Whitney U	223
Wilcoxon W	818
Z	-1.471
Asymp. Sig. (2-tailed)	0.141
a. Grouping Variable: Over_20_Years_Dental_Experience
Association between “21+ years of dental experience” and Q18 (Mann-Whitney U test [those who answered “I am not aware of this method” (option 6) for Q18 were excluded from the test]):
Over_20_Years_Dental_Experience * I feel that it would be helpful to include a video showing the tell-show-do method on the website/mobile app. Crosstabulation
			I feel that it would be helpful to include a video showing the tell-show-do method on the website/mobile app.				Total
			1	2	3	6
Over_20_Years_Dental_Experience	0	Count	5	11	1	1	18
		% within Over_20_Years_Dental_Experience	0.278	0.611	0.056	0.056	1
	1	Count	17	10	8	2	37
		% within Over_20_Years_Dental_Experience	0.459	0.27	0.216	0.054	1
Total		Count	22	21	9	3	55
		% within Over_20_Years_Dental_Experience	0.4	0.382	0.164	0.055	1
Ranks
	Over_20_Years_Dental_Experience	N	Mean Rank	Sum of Ranks
I feel that it would be helpful to include a video showing the tell-show-do method on the website/mobile app.	0	17	27.56	468.5
	1	35	25.99	909.5
	Total	52
Test Statisticsa
	I feel that it would be helpful to include a video showing the tell-show-do method on the website/mobile app.
Mann-Whitney U	279.5
Wilcoxon W	909.5
Z	-0.38
Asymp. Sig. (2-tailed)	0.704
a. Grouping Variable: Over_20_Years_Dental_Experience
Association between “21+ years of dental experience” and Q19 (Mann-Whitney U test):
Over_20_Years_Dental_Experience * I feel that video instructions would be helpful in simulating the dental experience for patients with Lowe syndrome. Crosstabulation
			I feel that video instructions would be helpful in simulating the dental experience for patients with Lowe syndrome.			Total
			1	2	3
Over_20_Years_Dental_Experience	0	Count	5	12	1	18
		% within Over_20_Years_Dental_Experience	0.278	0.667	0.056	1
	1	Count	13	17	7	37
		% within Over_20_Years_Dental_Experience	0.351	0.459	0.189	1
Total		Count	18	29	8	55
		% within Over_20_Years_Dental_Experience	0.327	0.527	0.145	1
Ranks
	Over_20_Years_Dental_Experience	N	Mean Rank	Sum of Ranks
I feel that video instructions would be helpful in simulating the dental experience for patients with Lowe syndrome.	0	18	27.5	495
	1	37	28.24	1045
	Total	55
Test Statisticsa
	I feel that video instructions would be helpful in simulating the dental experience for patients with Lowe syndrome.
Mann-Whitney U	324
Wilcoxon W	495
Z	-0.179
Asymp. Sig. (2-tailed)	0.858
a. Grouping Variable: Over_20_Years_Dental_Experience
Association between “21+ years of dental experience” and Q20 (Mann-Whitney U test):
Over_20_Years_Dental_Experience * I feel that pamphlets answering frequently asked questions would be helpful for patients with Lowe syndrome. Crosstabulation
			I feel that pamphlets answering frequently asked questions would be helpful for patients with Lowe syndrome.				Total
			1	2	3	5
Over_20_Years_Dental_Experience	0	Count	5	12	1	0	18
		% within Over_20_Years_Dental_Experience	0.278	0.667	0.056	0	1
	1	Count	19	10	6	1	36
		% within Over_20_Years_Dental_Experience	0.528	0.278	0.167	0.028	1
Total		Count	24	22	7	1	54
		% within Over_20_Years_Dental_Experience	0.444	0.407	0.13	0.019	1
Ranks
	Over_20_Years_Dental_Experience	N	Mean Rank	Sum of Ranks
I feel that pamphlets answering frequently asked questions would be helpful for patients with Lowe syndrome.	0	18	29.92	538.5
	1	36	26.29	946.5
	Total	54
Test Statisticsa
	I feel that pamphlets answering frequently asked questions would be helpful for patients with Lowe syndrome.
Mann-Whitney U	280.5
Wilcoxon W	946.5
Z	-0.87
Asymp. Sig. (2-tailed)	0.385
a. Grouping Variable: Over_20_Years_Dental_Experience
We wanted to compare categories based on number of days seeing patients per week, but not all of the categories had a big enough sample size. So we compared “3 days or fewer per week” vs. “at least 4 days per week”. In the variable below, 0 = “3 days or fewer per week” and 1 = “at least 4 days per week”.
See_Patients_At_Least_4_Days_Per_Week
		Frequency	Percent	Valid Percent	Cumulative Percent
Valid	0	28	38.4	40	40
	1	42	57.5	60	100
	Total	70	95.9	100
Missing	System	3	4.1
Total		73	100
Associations between “at least 4 days per week” and each part of Q15 (chi-square test):
Crosstab
			I feel that the following types of educational materials would be helpful for individuals with Lowe syndrome. (Select all that apply) - Website/Mobile app		Total
			0	1
See_Patients_At_Least_4_Days_Per_Week	0	Count	8	12	20
		% within See_Patients_At_Least_4_Days_Per_Week	0.4	0.6	1
	1	Count	11	25	36
		% within See_Patients_At_Least_4_Days_Per_Week	0.306	0.694	1
Total		Count	19	37	56
		% within See_Patients_At_Least_4_Days_Per_Week	0.339	0.661	1
Chi-Square Tests
	Value	df	Asymptotic Significance (2-sided)	Exact Sig. (2-sided)	Exact Sig. (1-sided)
Pearson Chi-Square	.512a	1	0.474
Continuity Correctionb	0.177	1	0.674
Likelihood Ratio	0.506	1	0.477
Fisher's Exact Test				0.561	0.335
Linear-by-Linear Association	0.502	1	0.478
N of Valid Cases	56
a. 0 cells (0.0%) have expected count less than 5. The minimum expected count is 6.79.
b. Computed only for a 2x2 table
Crosstab
			I feel that the following types of educational materials would be helpful for individuals with Lowe syndrome. (Select all that apply) - Introductory dental video		Total
			0	1
See_Patients_At_Least_4_Days_Per_Week	0	Count	5	15	20
		% within See_Patients_At_Least_4_Days_Per_Week	0.25	0.75	1
	1	Count	10	26	36
		% within See_Patients_At_Least_4_Days_Per_Week	0.278	0.722	1
Total		Count	15	41	56
		% within See_Patients_At_Least_4_Days_Per_Week	0.268	0.732	1
Chi-Square Tests
	Value	df	Asymptotic Significance (2-sided)	Exact Sig. (2-sided)	Exact Sig. (1-sided)
Pearson Chi-Square	.051a	1	0.822
Continuity Correctionb	0	1	1
Likelihood Ratio	0.051	1	0.821
Fisher's Exact Test				1	0.541
Linear-by-Linear Association	0.05	1	0.824
N of Valid Cases	56
a. 0 cells (0.0%) have expected count less than 5. The minimum expected count is 5.36.
b. Computed only for a 2x2 table
Crosstab
			I feel that the following types of educational materials would be helpful for individuals with Lowe syndrome. (Select all that apply) - Pamphlets with oral hygiene instructions		Total
			0	1
See_Patients_At_Least_4_Days_Per_Week	0	Count	4	16	20
		% within See_Patients_At_Least_4_Days_Per_Week	0.2	0.8	1
	1	Count	12	24	36
		% within See_Patients_At_Least_4_Days_Per_Week	0.333	0.667	1
Total		Count	16	40	56
		% within See_Patients_At_Least_4_Days_Per_Week	0.286	0.714	1
Chi-Square Tests
	Value	df	Asymptotic Significance (2-sided)	Exact Sig. (2-sided)	Exact Sig. (1-sided)
Pearson Chi-Square	1.120a	1	0.29
Continuity Correctionb	0.562	1	0.453
Likelihood Ratio	1.161	1	0.281
Fisher's Exact Test				0.365	0.229
Linear-by-Linear Association	1.1	1	0.294
N of Valid Cases	56
a. 0 cells (0.0%) have expected count less than 5. The minimum expected count is 5.71.
b. Computed only for a 2x2 table
Crosstab
			I feel that the following types of educational materials would be helpful for individuals with Lowe syndrome. (Select all that apply) - Media channels (e.g., TikTok/Instagram/YouTube)		Total
			0	1
See_Patients_At_Least_4_Days_Per_Week	0	Count	15	5	20
		% within See_Patients_At_Least_4_Days_Per_Week	0.75	0.25	1
	1	Count	24	12	36
		% within See_Patients_At_Least_4_Days_Per_Week	0.667	0.333	1
Total		Count	39	17	56
		% within See_Patients_At_Least_4_Days_Per_Week	0.696	0.304	1
Chi-Square Tests
	Value	df	Asymptotic Significance (2-sided)	Exact Sig. (2-sided)	Exact Sig. (1-sided)
Pearson Chi-Square	.422a	1	0.516
Continuity Correctionb	0.12	1	0.729
Likelihood Ratio	0.43	1	0.512
Fisher's Exact Test				0.561	0.369
Linear-by-Linear Association	0.415	1	0.52
N of Valid Cases	56
a. 0 cells (0.0%) have expected count less than 5. The minimum expected count is 6.07.
b. Computed only for a 2x2 table
Crosstab
			I feel that the following types of educational materials would be helpful for individuals with Lowe syndrome. (Select all that apply) - Podcasts featuring dental experts		Total
			0	1
See_Patients_At_Least_4_Days_Per_Week	0	Count	11	9	20
		% within See_Patients_At_Least_4_Days_Per_Week	0.55	0.45	1
	1	Count	26	10	36
		% within See_Patients_At_Least_4_Days_Per_Week	0.722	0.278	1
Total		Count	37	19	56
		% within See_Patients_At_Least_4_Days_Per_Week	0.661	0.339	1
Chi-Square Tests
	Value	df	Asymptotic Significance (2-sided)	Exact Sig. (2-sided)	Exact Sig. (1-sided)
Pearson Chi-Square	1.701a	1	0.192
Continuity Correctionb	1.02	1	0.313
Likelihood Ratio	1.677	1	0.195
Fisher's Exact Test				0.244	0.156
Linear-by-Linear Association	1.671	1	0.196
N of Valid Cases	56
a. 0 cells (0.0%) have expected count less than 5. The minimum expected count is 6.79.
b. Computed only for a 2x2 table
Crosstab
			I feel that the following types of educational materials would be helpful for individuals with Lowe syndrome. (Select all that apply) - Focus groups		Total
			0	1
See_Patients_At_Least_4_Days_Per_Week	0	Count	14	6	20
		% within See_Patients_At_Least_4_Days_Per_Week	0.7	0.3	1
	1	Count	26	10	36
		% within See_Patients_At_Least_4_Days_Per_Week	0.722	0.278	1
Total		Count	40	16	56
		% within See_Patients_At_Least_4_Days_Per_Week	0.714	0.286	1
Chi-Square Tests
	Value	df	Asymptotic Significance (2-sided)	Exact Sig. (2-sided)	Exact Sig. (1-sided)
Pearson Chi-Square	.031a	1	0.86
Continuity Correctionb	0	1	1
Likelihood Ratio	0.031	1	0.86
Fisher's Exact Test				1	0.547
Linear-by-Linear Association	0.031	1	0.861
N of Valid Cases	56
a. 0 cells (0.0%) have expected count less than 5. The minimum expected count is 5.71.
b. Computed only for a 2x2 table
Association between “at least 4 days per week” and Q13 (Mann-Whitney U test):
See_Patients_At_Least_4_Days_Per_Week * In the next section of the survey, please provide your level of agreement with the following statements about potential educational materials to be given to patients with Lowe syndrome and their caregivers.I feel there is a need for more educational materials to help patients with Lowe syndrome in the dental setting. Crosstabulation
			In the next section of the survey, please provide your level of agreement with the following statements about potential educational materials to be given to patients with Lowe syndrome and their caregivers.I feel there is a need for more educational materials to help patients with Lowe syndrome in the dental setting.			Total
			1	2	3
See_Patients_At_Least_4_Days_Per_Week	0	Count	9	5	6	20
		% within See_Patients_At_Least_4_Days_Per_Week	0.45	0.25	0.3	1
	1	Count	16	17	5	38
		% within See_Patients_At_Least_4_Days_Per_Week	0.421	0.447	0.132	1
Total		Count	25	22	11	58
		% within See_Patients_At_Least_4_Days_Per_Week	0.431	0.379	0.19	1
Ranks
	See_Patients_At_Least_4_Days_Per_Week	N	Mean Rank	Sum of Ranks
In the next section of the survey, please provide your level of agreement with the following statements about potential educational materials to be given to patients with Lowe syndrome and their caregivers.I feel there is a need for more educational materials to help patients with Lowe syndrome in the dental setting.	0	20	30.88	617.5
	1	38	28.78	1093.5
	Total	58
Test Statisticsa
	In the next section of the survey, please provide your level of agreement with the following statements about potential educational materials to be given to patients with Lowe syndrome and their caregivers.I feel there is a need for more educational materials to help patients with Lowe syndrome in the dental setting.
Mann-Whitney U	352.5
Wilcoxon W	1093.5
Z	-0.485
Asymp. Sig. (2-tailed)	0.627
a. Grouping Variable: See_Patients_At_Least_4_Days_Per_Week
Association between “at least 4 days per week” and Q14 (Mann-Whitney U test):
See_Patients_At_Least_4_Days_Per_Week * I feel there is a need for more educational materials to help patients with IDDs in general in the dental setting. Crosstabulation
			I feel there is a need for more educational materials to help patients with IDDs in general in the dental setting.			Total
			1	2	3
See_Patients_At_Least_4_Days_Per_Week	0	Count	9	7	4	20
		% within See_Patients_At_Least_4_Days_Per_Week	0.45	0.35	0.2	1
	1	Count	20	13	5	38
		% within See_Patients_At_Least_4_Days_Per_Week	0.526	0.342	0.132	1
Total		Count	29	20	9	58
		% within See_Patients_At_Least_4_Days_Per_Week	0.5	0.345	0.155	1
Ranks
	See_Patients_At_Least_4_Days_Per_Week	N	Mean Rank	Sum of Ranks
I feel there is a need for more educational materials to help patients with IDDs in general in the dental setting.	0	20	31.38	627.5
	1	38	28.51	1083.5
	Total	58
Test Statisticsa
	I feel there is a need for more educational materials to help patients with IDDs in general in the dental setting.
Mann-Whitney U	342.5
Wilcoxon W	1083.5
Z	-0.673
Asymp. Sig. (2-tailed)	0.501
a. Grouping Variable: See_Patients_At_Least_4_Days_Per_Week
Association between “at least 4 days per week” and Q16 (Mann-Whitney U test [those who answered “I am not aware of this feature” (option 6) for Q16 were excluded from the test]):
See_Patients_At_Least_4_Days_Per_Week * I feel that it would be helpful to include a toothbrushing timer with a cartoon animation (similar to the Brush Hero phone app) on the Website/Mobile app. Crosstabulation
			I feel that it would be helpful to include a toothbrushing timer with a cartoon animation (similar to the Brush Hero phone app) on the Website/Mobile app.					Total
			1	2	3	4	6
See_Patients_At_Least_4_Days_Per_Week	0	Count	4	11	1	0	3	19
		% within See_Patients_At_Least_4_Days_Per_Week	0.211	0.579	0.053	0	0.158	1
	1	Count	12	12	5	1	6	36
		% within See_Patients_At_Least_4_Days_Per_Week	0.333	0.333	0.139	0.028	0.167	1
Total		Count	16	23	6	1	9	55
		% within See_Patients_At_Least_4_Days_Per_Week	0.291	0.418	0.109	0.018	0.164	1
Ranks
	See_Patients_At_Least_4_Days_Per_Week	N	Mean Rank	Sum of Ranks
I feel that it would be helpful to include a toothbrushing timer with a cartoon animation (similar to the Brush Hero phone app) on the Website/Mobile app.	0	16	24.03	384.5
	1	30	23.22	696.5
	Total	46
Test Statisticsa
	I feel that it would be helpful to include a toothbrushing timer with a cartoon animation (similar to the Brush Hero phone app) on the Website/Mobile app.
Mann-Whitney U	231.5
Wilcoxon W	696.5
Z	-0.215
Asymp. Sig. (2-tailed)	0.83
a. Grouping Variable: See_Patients_At_Least_4_Days_Per_Week
Association between “at least 4 days per week” and Q17 (Mann-Whitney U test [those who answered “I am not aware of this feature” (option 6) for Q17 were excluded from the test]):
See_Patients_At_Least_4_Days_Per_Week * I feel that it would be helpful to include an access to care map/animation (similar to the ADAâ€™s Find A Dentist feature) on the website/mobile app. Crosstabulation
			I feel that it would be helpful to include an access to care map/animation (similar to the ADAâ€™s Find A Dentist feature) on the website/mobile app.				Total
			1	2	3	6
See_Patients_At_Least_4_Days_Per_Week	0	Count	8	10	1	0	19
		% within See_Patients_At_Least_4_Days_Per_Week	0.421	0.526	0.053	0	1
	1	Count	16	14	3	4	37
		% within See_Patients_At_Least_4_Days_Per_Week	0.432	0.378	0.081	0.108	1
Total		Count	24	24	4	4	56
		% within See_Patients_At_Least_4_Days_Per_Week	0.429	0.429	0.071	0.071	1
Ranks
	See_Patients_At_Least_4_Days_Per_Week	N	Mean Rank	Sum of Ranks
I feel that it would be helpful to include an access to care map/animation (similar to the ADAâ€™s Find A Dentist feature) on the website/mobile app.	0	19	27.13	515.5
	1	33	26.14	862.5
	Total	52
Test Statisticsa
	I feel that it would be helpful to include an access to care map/animation (similar to the ADAâ€™s Find A Dentist feature) on the website/mobile app.
Mann-Whitney U	301.5
Wilcoxon W	862.5
Z	-0.254
Asymp. Sig. (2-tailed)	0.799
a. Grouping Variable: See_Patients_At_Least_4_Days_Per_Week
Association between “at least 4 days per week” and Q18 (Mann-Whitney U test [those who answered “I am not aware of this method” (option 6) for Q18 were excluded from the test]):
See_Patients_At_Least_4_Days_Per_Week * I feel that it would be helpful to include a video showing the tell-show-do method on the website/mobile app. Crosstabulation
			I feel that it would be helpful to include a video showing the tell-show-do method on the website/mobile app.				Total
			1	2	3	6
See_Patients_At_Least_4_Days_Per_Week	0	Count	7	9	2	1	19
		% within See_Patients_At_Least_4_Days_Per_Week	0.368	0.474	0.105	0.053	1
	1	Count	15	13	7	2	37
		% within See_Patients_At_Least_4_Days_Per_Week	0.405	0.351	0.189	0.054	1
Total		Count	22	22	9	3	56
		% within See_Patients_At_Least_4_Days_Per_Week	0.393	0.393	0.161	0.054	1
Ranks
	See_Patients_At_Least_4_Days_Per_Week	N	Mean Rank	Sum of Ranks
I feel that it would be helpful to include a video showing the tell-show-do method on the website/mobile app.	0	18	26.67	480
	1	35	27.17	951
	Total	53
Test Statisticsa
	I feel that it would be helpful to include a video showing the tell-show-do method on the website/mobile app.
Mann-Whitney U	309
Wilcoxon W	480
Z	-0.122
Asymp. Sig. (2-tailed)	0.903
a. Grouping Variable: See_Patients_At_Least_4_Days_Per_Week
Association between “at least 4 days per week” and Q19 (Mann-Whitney U test):
See_Patients_At_Least_4_Days_Per_Week * I feel that video instructions would be helpful in simulating the dental experience for patients with Lowe syndrome. Crosstabulation
			I feel that video instructions would be helpful in simulating the dental experience for patients with Lowe syndrome.			Total
			1	2	3
See_Patients_At_Least_4_Days_Per_Week	0	Count	6	11	2	19
		% within See_Patients_At_Least_4_Days_Per_Week	0.316	0.579	0.105	1
	1	Count	12	19	6	37
		% within See_Patients_At_Least_4_Days_Per_Week	0.324	0.514	0.162	1
Total		Count	18	30	8	56
		% within See_Patients_At_Least_4_Days_Per_Week	0.321	0.536	0.143	1
Ranks
	See_Patients_At_Least_4_Days_Per_Week	N	Mean Rank	Sum of Ranks
I feel that video instructions would be helpful in simulating the dental experience for patients with Lowe syndrome.	0	19	27.92	530.5
	1	37	28.8	1065.5
	Total	56
Test Statisticsa
	I feel that video instructions would be helpful in simulating the dental experience for patients with Lowe syndrome.
Mann-Whitney U	340.5
Wilcoxon W	530.5
Z	-0.211
Asymp. Sig. (2-tailed)	0.833
a. Grouping Variable: See_Patients_At_Least_4_Days_Per_Week
Association between “at least 4 days per week” and Q20 (Mann-Whitney U test):
See_Patients_At_Least_4_Days_Per_Week * I feel that pamphlets answering frequently asked questions would be helpful for patients with Lowe syndrome. Crosstabulation
			I feel that pamphlets answering frequently asked questions would be helpful for patients with Lowe syndrome.				Total
			1	2	3	5
See_Patients_At_Least_4_Days_Per_Week	0	Count	7	9	2	0	18
		% within See_Patients_At_Least_4_Days_Per_Week	0.389	0.5	0.111	0	1
	1	Count	18	13	5	1	37
		% within See_Patients_At_Least_4_Days_Per_Week	0.486	0.351	0.135	0.027	1
Total		Count	25	22	7	1	55
		% within See_Patients_At_Least_4_Days_Per_Week	0.455	0.4	0.127	0.018	1
Ranks
	See_Patients_At_Least_4_Days_Per_Week	N	Mean Rank	Sum of Ranks
I feel that pamphlets answering frequently asked questions would be helpful for patients with Lowe syndrome.	0	18	28.97	521.5
	1	37	27.53	1018.5
	Total	55
Test Statisticsa
	I feel that pamphlets answering frequently asked questions would be helpful for patients with Lowe syndrome.
Mann-Whitney U	315.5
Wilcoxon W	1018.5
Z	-0.342
Asymp. Sig. (2-tailed)	0.732
a. Grouping Variable: See_Patients_At_Least_4_Days_Per_Week
Regarding the number of patients seen per week, we categorized them based on whether they see at least 41 patients per week. Those who reported seeing patients zero days per week were categorized as seeing fewer than 41 patients per week. In the variable below, 0 = fewer than 41 patients per week, while 1 = at least 41 patients per week:
See_At_Least_41_Patients_Per_Week
		Frequency	Percent	Valid Percent	Cumulative Percent
Valid	0	32	43.8	49.2	49.2
	1	33	45.2	50.8	100
	Total	65	89	100
Missing	System	8	11
Total		73	100
Associations between “at least 41 patients per week” and each part of Q15 (chi-square test):
Crosstab
			I feel that the following types of educational materials would be helpful for individuals with Lowe syndrome. (Select all that apply) - Website/Mobile app		Total
			0	1
See_At_Least_41_Patients_Per_Week	0	Count	11	13	24
		% within See_At_Least_41_Patients_Per_Week	0.458	0.542	1
	1	Count	8	24	32
		% within See_At_Least_41_Patients_Per_Week	0.25	0.75	1
Total		Count	19	37	56
		% within See_At_Least_41_Patients_Per_Week	0.339	0.661	1
Chi-Square Tests
	Value	df	Asymptotic Significance (2-sided)	Exact Sig. (2-sided)	Exact Sig. (1-sided)
Pearson Chi-Square	2.655a	1	0.103
Continuity Correctionb	1.807	1	0.179
Likelihood Ratio	2.649	1	0.104
Fisher's Exact Test				0.154	0.09
Linear-by-Linear Association	2.608	1	0.106
N of Valid Cases	56
a. 0 cells (0.0%) have expected count less than 5. The minimum expected count is 8.14.
b. Computed only for a 2x2 table
Crosstab
			I feel that the following types of educational materials would be helpful for individuals with Lowe syndrome. (Select all that apply) - Introductory dental video		Total
			0	1
See_At_Least_41_Patients_Per_Week	0	Count	9	15	24
		% within See_At_Least_41_Patients_Per_Week	0.375	0.625	1
	1	Count	6	26	32
		% within See_At_Least_41_Patients_Per_Week	0.188	0.813	1
Total		Count	15	41	56
		% within See_At_Least_41_Patients_Per_Week	0.268	0.732	1
Chi-Square Tests
	Value	df	Asymptotic Significance (2-sided)	Exact Sig. (2-sided)	Exact Sig. (1-sided)
Pearson Chi-Square	2.459a	1	0.117
Continuity Correctionb	1.595	1	0.207
Likelihood Ratio	2.445	1	0.118
Fisher's Exact Test				0.138	0.104
Linear-by-Linear Association	2.415	1	0.12
N of Valid Cases	56
a. 0 cells (0.0%) have expected count less than 5. The minimum expected count is 6.43.
b. Computed only for a 2x2 table
Crosstab
			I feel that the following types of educational materials would be helpful for individuals with Lowe syndrome. (Select all that apply) - Pamphlets with oral hygiene instructions		Total
			0	1
See_At_Least_41_Patients_Per_Week	0	Count	6	18	24
		% within See_At_Least_41_Patients_Per_Week	0.25	0.75	1
	1	Count	10	22	32
		% within See_At_Least_41_Patients_Per_Week	0.313	0.688	1
Total		Count	16	40	56
		% within See_At_Least_41_Patients_Per_Week	0.286	0.714	1
Chi-Square Tests
	Value	df	Asymptotic Significance (2-sided)	Exact Sig. (2-sided)	Exact Sig. (1-sided)
Pearson Chi-Square	.263a	1	0.608
Continuity Correctionb	0.046	1	0.831
Likelihood Ratio	0.265	1	0.607
Fisher's Exact Test				0.767	0.418
Linear-by-Linear Association	0.258	1	0.612
N of Valid Cases	56
a. 0 cells (0.0%) have expected count less than 5. The minimum expected count is 6.86.
b. Computed only for a 2x2 table
Crosstab
			I feel that the following types of educational materials would be helpful for individuals with Lowe syndrome. (Select all that apply) - Media channels (e.g., TikTok/Instagram/YouTube)		Total
			0	1
See_At_Least_41_Patients_Per_Week	0	Count	20	4	24
		% within See_At_Least_41_Patients_Per_Week	0.833	0.167	1
	1	Count	19	13	32
		% within See_At_Least_41_Patients_Per_Week	0.594	0.406	1
Total		Count	39	17	56
		% within See_At_Least_41_Patients_Per_Week	0.696	0.304	1
Chi-Square Tests
	Value	df	Asymptotic Significance (2-sided)	Exact Sig. (2-sided)	Exact Sig. (1-sided)
Pearson Chi-Square	3.723a	1	0.054
Continuity Correctionb	2.676	1	0.102
Likelihood Ratio	3.896	1	0.048
Fisher's Exact Test				0.079	0.049
Linear-by-Linear Association	3.657	1	0.056
N of Valid Cases	56
a. 0 cells (0.0%) have expected count less than 5. The minimum expected count is 7.29.
b. Computed only for a 2x2 table
Crosstab
			I feel that the following types of educational materials would be helpful for individuals with Lowe syndrome. (Select all that apply) - Podcasts featuring dental experts		Total
			0	1
See_At_Least_41_Patients_Per_Week	0	Count	15	9	24
		% within See_At_Least_41_Patients_Per_Week	0.625	0.375	1
	1	Count	22	10	32
		% within See_At_Least_41_Patients_Per_Week	0.688	0.313	1
Total		Count	37	19	56
		% within See_At_Least_41_Patients_Per_Week	0.661	0.339	1
Chi-Square Tests
	Value	df	Asymptotic Significance (2-sided)	Exact Sig. (2-sided)	Exact Sig. (1-sided)
Pearson Chi-Square	.239a	1	0.625
Continuity Correctionb	0.041	1	0.839
Likelihood Ratio	0.238	1	0.625
Fisher's Exact Test				0.777	0.418
Linear-by-Linear Association	0.235	1	0.628
N of Valid Cases	56
a. 0 cells (0.0%) have expected count less than 5. The minimum expected count is 8.14.
b. Computed only for a 2x2 table
Crosstab
			I feel that the following types of educational materials would be helpful for individuals with Lowe syndrome. (Select all that apply) - Focus groups		Total
			0	1
See_At_Least_41_Patients_Per_Week	0	Count	19	5	24
		% within See_At_Least_41_Patients_Per_Week	0.792	0.208	1
	1	Count	21	11	32
		% within See_At_Least_41_Patients_Per_Week	0.656	0.344	1
Total		Count	40	16	56
		% within See_At_Least_41_Patients_Per_Week	0.714	0.286	1
Chi-Square Tests
	Value	df	Asymptotic Significance (2-sided)	Exact Sig. (2-sided)	Exact Sig. (1-sided)
Pearson Chi-Square	1.232a	1	0.267
Continuity Correctionb	0.658	1	0.417
Likelihood Ratio	1.259	1	0.262
Fisher's Exact Test				0.373	0.21
Linear-by-Linear Association	1.21	1	0.271
N of Valid Cases	56
a. 0 cells (0.0%) have expected count less than 5. The minimum expected count is 6.86.
b. Computed only for a 2x2 table
Association between “at least 41 patients per week” and Q13 (Mann-Whitney U test):
See_At_Least_41_Patients_Per_Week * In the next section of the survey, please provide your level of agreement with the following statements about potential educational materials to be given to patients with Lowe syndrome and their caregivers.I feel there is a need for more educational materials to help patients with Lowe syndrome in the dental setting. Crosstabulation
			In the next section of the survey, please provide your level of agreement with the following statements about potential educational materials to be given to patients with Lowe syndrome and their caregivers.I feel there is a need for more educational materials to help patients with Lowe syndrome in the dental setting.			Total
			1	2	3
See_At_Least_41_Patients_Per_Week	0	Count	12	7	7	26
		% within See_At_Least_41_Patients_Per_Week	0.462	0.269	0.269	1
	1	Count	13	15	4	32
		% within See_At_Least_41_Patients_Per_Week	0.406	0.469	0.125	1
Total		Count	25	22	11	58
		% within See_At_Least_41_Patients_Per_Week	0.431	0.379	0.19	1
Ranks
	See_At_Least_41_Patients_Per_Week	N	Mean Rank	Sum of Ranks
In the next section of the survey, please provide your level of agreement with the following statements about potential educational materials to be given to patients with Lowe syndrome and their caregivers.I feel there is a need for more educational materials to help patients with Lowe syndrome in the dental setting.	0	26	30.1	782.5
	1	32	29.02	928.5
	Total	58
Test Statisticsa
	In the next section of the survey, please provide your level of agreement with the following statements about potential educational materials to be given to patients with Lowe syndrome and their caregivers.I feel there is a need for more educational materials to help patients with Lowe syndrome in the dental setting.
Mann-Whitney U	400.5
Wilcoxon W	928.5
Z	-0.262
Asymp. Sig. (2-tailed)	0.794
a. Grouping Variable: See_At_Least_41_Patients_Per_Week
Association between “at least 41 patients per week” and Q14 (Mann-Whitney U test):
See_At_Least_41_Patients_Per_Week * I feel there is a need for more educational materials to help patients with IDDs in general in the dental setting. Crosstabulation
			I feel there is a need for more educational materials to help patients with IDDs in general in the dental setting.			Total
			1	2	3
See_At_Least_41_Patients_Per_Week	0	Count	13	9	4	26
		% within See_At_Least_41_Patients_Per_Week	0.5	0.346	0.154	1
	1	Count	16	11	5	32
		% within See_At_Least_41_Patients_Per_Week	0.5	0.344	0.156	1
Total		Count	29	20	9	58
		% within See_At_Least_41_Patients_Per_Week	0.5	0.345	0.155	1
Ranks
	See_At_Least_41_Patients_Per_Week	N	Mean Rank	Sum of Ranks
I feel there is a need for more educational materials to help patients with IDDs in general in the dental setting.	0	26	29.48	766.5
	1	32	29.52	944.5
	Total	58
Test Statisticsa
	I feel there is a need for more educational materials to help patients with IDDs in general in the dental setting.
Mann-Whitney U	415.5
Wilcoxon W	766.5
Z	-0.009
Asymp. Sig. (2-tailed)	0.993
a. Grouping Variable: See_At_Least_41_Patients_Per_Week
Association between “at least 41 patients per week” and Q16 (Mann-Whitney U test [those who answered “I am not aware of this feature” (option 6) for Q16 were excluded from the test]):
See_At_Least_41_Patients_Per_Week * I feel that it would be helpful to include a toothbrushing timer with a cartoon animation (similar to the Brush Hero phone app) on the Website/Mobile app. Crosstabulation
			I feel that it would be helpful to include a toothbrushing timer with a cartoon animation (similar to the Brush Hero phone app) on the Website/Mobile app.					Total
			1	2	3	4	6
See_At_Least_41_Patients_Per_Week	0	Count	5	12	1	1	4	23
		% within See_At_Least_41_Patients_Per_Week	0.217	0.522	0.043	0.043	0.174	1
	1	Count	11	11	5	0	5	32
		% within See_At_Least_41_Patients_Per_Week	0.344	0.344	0.156	0	0.156	1
Total		Count	16	23	6	1	9	55
		% within See_At_Least_41_Patients_Per_Week	0.291	0.418	0.109	0.018	0.164	1
Ranks
	See_At_Least_41_Patients_Per_Week	N	Mean Rank	Sum of Ranks
I feel that it would be helpful to include a toothbrushing timer with a cartoon animation (similar to the Brush Hero phone app) on the Website/Mobile app.	0	19	24.58	467
	1	27	22.74	614
	Total	46
Test Statisticsa
	I feel that it would be helpful to include a toothbrushing timer with a cartoon animation (similar to the Brush Hero phone app) on the Website/Mobile app.
Mann-Whitney U	236
Wilcoxon W	614
Z	-0.502
Asymp. Sig. (2-tailed)	0.616
a. Grouping Variable: See_At_Least_41_Patients_Per_Week
Association between “at least 41 patients per week” and Q17 (Mann-Whitney U test [those who answered “I am not aware of this feature” (option 6) for Q17 were excluded from the test]):
See_At_Least_41_Patients_Per_Week * I feel that it would be helpful to include an access to care map/animation (similar to the ADAâ€™s Find A Dentist feature) on the website/mobile app. Crosstabulation
			I feel that it would be helpful to include an access to care map/animation (similar to the ADAâ€™s Find A Dentist feature) on the website/mobile app.				Total
			1	2	3	6
See_At_Least_41_Patients_Per_Week	0	Count	9	14	1	0	24
		% within See_At_Least_41_Patients_Per_Week	0.375	0.583	0.042	0	1
	1	Count	15	10	3	4	32
		% within See_At_Least_41_Patients_Per_Week	0.469	0.313	0.094	0.125	1
Total		Count	24	24	4	4	56
		% within See_At_Least_41_Patients_Per_Week	0.429	0.429	0.071	0.071	1
Ranks
	See_At_Least_41_Patients_Per_Week	N	Mean Rank	Sum of Ranks
I feel that it would be helpful to include an access to care map/animation (similar to the ADAâ€™s Find A Dentist feature) on the website/mobile app.	0	24	28.08	674
	1	28	25.14	704
	Total	52
Test Statisticsa
	I feel that it would be helpful to include an access to care map/animation (similar to the ADAâ€™s Find A Dentist feature) on the website/mobile app.
Mann-Whitney U	298
Wilcoxon W	704
Z	-0.778
Asymp. Sig. (2-tailed)	0.436
a. Grouping Variable: See_At_Least_41_Patients_Per_Week
Association between “at least 41 patients per week” and Q18 (Mann-Whitney U test [those who answered “I am not aware of this method” (option 6) for Q18 were excluded from the test]):
See_At_Least_41_Patients_Per_Week * I feel that it would be helpful to include a video showing the tell-show-do method on the website/mobile app. Crosstabulation
			I feel that it would be helpful to include a video showing the tell-show-do method on the website/mobile app.				Total
			1	2	3	6
See_At_Least_41_Patients_Per_Week	0	Count	8	12	3	1	24
		% within See_At_Least_41_Patients_Per_Week	0.333	0.5	0.125	0.042	1
	1	Count	14	10	6	2	32
		% within See_At_Least_41_Patients_Per_Week	0.438	0.313	0.188	0.063	1
Total		Count	22	22	9	3	56
		% within See_At_Least_41_Patients_Per_Week	0.393	0.393	0.161	0.054	1
Ranks
	See_At_Least_41_Patients_Per_Week	N	Mean Rank	Sum of Ranks
I feel that it would be helpful to include a video showing the tell-show-do method on the website/mobile app.	0	23	27.87	641
	1	30	26.33	790
	Total	53
Test Statisticsa
	I feel that it would be helpful to include a video showing the tell-show-do method on the website/mobile app.
Mann-Whitney U	325
Wilcoxon W	790
Z	-0.389
Asymp. Sig. (2-tailed)	0.697
a. Grouping Variable: See_At_Least_41_Patients_Per_Week
Association between “at least 41 patients per week” and Q19 (Mann-Whitney U test):
See_At_Least_41_Patients_Per_Week * I feel that video instructions would be helpful in simulating the dental experience for patients with Lowe syndrome. Crosstabulation
			I feel that video instructions would be helpful in simulating the dental experience for patients with Lowe syndrome.			Total
			1	2	3
See_At_Least_41_Patients_Per_Week	0	Count	7	13	4	24
		% within See_At_Least_41_Patients_Per_Week	0.292	0.542	0.167	1
	1	Count	11	17	4	32
		% within See_At_Least_41_Patients_Per_Week	0.344	0.531	0.125	1
Total		Count	18	30	8	56
		% within See_At_Least_41_Patients_Per_Week	0.321	0.536	0.143	1
Ranks
	See_At_Least_41_Patients_Per_Week	N	Mean Rank	Sum of Ranks
I feel that video instructions would be helpful in simulating the dental experience for patients with Lowe syndrome.	0	24	29.67	712
	1	32	27.63	884
	Total	56
Test Statisticsa
	I feel that video instructions would be helpful in simulating the dental experience for patients with Lowe syndrome.
Mann-Whitney U	356
Wilcoxon W	884
Z	-0.515
Asymp. Sig. (2-tailed)	0.607
a. Grouping Variable: See_At_Least_41_Patients_Per_Week
Association between “at least 41 patients per week” and Q20 (Mann-Whitney U test):
See_At_Least_41_Patients_Per_Week * I feel that pamphlets answering frequently asked questions would be helpful for patients with Lowe syndrome. Crosstabulation
			I feel that pamphlets answering frequently asked questions would be helpful for patients with Lowe syndrome.				Total
			1	2	3	5
See_At_Least_41_Patients_Per_Week	0	Count	10	10	3	0	23
		% within See_At_Least_41_Patients_Per_Week	0.435	0.435	0.13	0	1
	1	Count	15	12	4	1	32
		% within See_At_Least_41_Patients_Per_Week	0.469	0.375	0.125	0.031	1
Total		Count	25	22	7	1	55
		% within See_At_Least_41_Patients_Per_Week	0.455	0.4	0.127	0.018	1
Ranks
	See_At_Least_41_Patients_Per_Week	N	Mean Rank	Sum of Ranks
I feel that pamphlets answering frequently asked questions would be helpful for patients with Lowe syndrome.	0	23	28.17	648
	1	32	27.88	892
	Total	55
Test Statisticsa
	I feel that pamphlets answering frequently asked questions would be helpful for patients with Lowe syndrome.
Mann-Whitney U	364
Wilcoxon W	892
Z	-0.074
Asymp. Sig. (2-tailed)	0.941
a. Grouping Variable: See_At_Least_41_Patients_Per_Week
Based on Q12, we created a variable, “Treat_Any_Patients_With_Special_Needs_IDDs”, that tells whether the subject treats any patients with special needs / IDDs. 0 = Does not treat any patients with special needs / IDDs, 1 = Treats patients with special needs / IDDs.
Treat_Any_Patients_With_Special_Needs_IDDs
		Frequency	Percent	Valid Percent	Cumulative Percent
Valid	0	22	30.1	36.1	36.1
	1	39	53.4	63.9	100
	Total	61	83.6	100
Missing	System	12	16.4
Total		73	100
Associations between “treat any patients with special needs / IDDs” and each part of Q15 (chi-square test):
Crosstab
			I feel that the following types of educational materials would be helpful for individuals with Lowe syndrome. (Select all that apply) - Website/Mobile app		Total
			0	1
Treat_Any_Patients_With_Special_Needs_IDDs	0	Count	8	11	19
		% within Treat_Any_Patients_With_Special_Needs_IDDs	0.421	0.579	1
	1	Count	11	26	37
		% within Treat_Any_Patients_With_Special_Needs_IDDs	0.297	0.703	1
Total		Count	19	37	56
		% within Treat_Any_Patients_With_Special_Needs_IDDs	0.339	0.661	1
Chi-Square Tests
	Value	df	Asymptotic Significance (2-sided)	Exact Sig. (2-sided)	Exact Sig. (1-sided)
Pearson Chi-Square	.858a	1	0.354
Continuity Correctionb	0.394	1	0.53
Likelihood Ratio	0.846	1	0.358
Fisher's Exact Test				0.385	0.263
Linear-by-Linear Association	0.842	1	0.359
N of Valid Cases	56
a. 0 cells (0.0%) have expected count less than 5. The minimum expected count is 6.45.
b. Computed only for a 2x2 table
Crosstab
			I feel that the following types of educational materials would be helpful for individuals with Lowe syndrome. (Select all that apply) - Introductory dental video		Total
			0	1
Treat_Any_Patients_With_Special_Needs_IDDs	0	Count	7	12	19
		% within Treat_Any_Patients_With_Special_Needs_IDDs	0.368	0.632	1
	1	Count	8	29	37
		% within Treat_Any_Patients_With_Special_Needs_IDDs	0.216	0.784	1
Total		Count	15	41	56
		% within Treat_Any_Patients_With_Special_Needs_IDDs	0.268	0.732	1
Chi-Square Tests
	Value	df	Asymptotic Significance (2-sided)	Exact Sig. (2-sided)	Exact Sig. (1-sided)
Pearson Chi-Square	1.483a	1	0.223
Continuity Correctionb	0.808	1	0.369
Likelihood Ratio	1.443	1	0.23
Fisher's Exact Test				0.339	0.184
Linear-by-Linear Association	1.456	1	0.227
N of Valid Cases	56
a. 0 cells (0.0%) have expected count less than 5. The minimum expected count is 5.09.
b. Computed only for a 2x2 table
Crosstab
			I feel that the following types of educational materials would be helpful for individuals with Lowe syndrome. (Select all that apply) - Pamphlets with oral hygiene instructions		Total
			0	1
Treat_Any_Patients_With_Special_Needs_IDDs	0	Count	4	15	19
		% within Treat_Any_Patients_With_Special_Needs_IDDs	0.211	0.789	1
	1	Count	12	25	37
		% within Treat_Any_Patients_With_Special_Needs_IDDs	0.324	0.676	1
Total		Count	16	40	56
		% within Treat_Any_Patients_With_Special_Needs_IDDs	0.286	0.714	1
Chi-Square Tests
	Value	df	Asymptotic Significance (2-sided)	Exact Sig. (2-sided)	Exact Sig. (1-sided)
Pearson Chi-Square	.797a	1	0.372
Continuity Correctionb	0.337	1	0.562
Likelihood Ratio	0.823	1	0.364
Fisher's Exact Test				0.534	0.285
Linear-by-Linear Association	0.782	1	0.376
N of Valid Cases	56
a. 0 cells (0.0%) have expected count less than 5. The minimum expected count is 5.43.
b. Computed only for a 2x2 table
Crosstab
			I feel that the following types of educational materials would be helpful for individuals with Lowe syndrome. (Select all that apply) - Media channels (e.g., TikTok/Instagram/YouTube)		Total
			0	1
Treat_Any_Patients_With_Special_Needs_IDDs	0	Count	14	5	19
		% within Treat_Any_Patients_With_Special_Needs_IDDs	0.737	0.263	1
	1	Count	25	12	37
		% within Treat_Any_Patients_With_Special_Needs_IDDs	0.676	0.324	1
Total		Count	39	17	56
		% within Treat_Any_Patients_With_Special_Needs_IDDs	0.696	0.304	1
Chi-Square Tests
	Value	df	Asymptotic Significance (2-sided)	Exact Sig. (2-sided)	Exact Sig. (1-sided)
Pearson Chi-Square	.222a	1	0.637
Continuity Correctionb	0.027	1	0.869
Likelihood Ratio	0.225	1	0.635
Fisher's Exact Test				0.763	0.44
Linear-by-Linear Association	0.218	1	0.64
N of Valid Cases	56
a. 0 cells (0.0%) have expected count less than 5. The minimum expected count is 5.77.
b. Computed only for a 2x2 table
Crosstab
			I feel that the following types of educational materials would be helpful for individuals with Lowe syndrome. (Select all that apply) - Podcasts featuring dental experts		Total
			0	1
Treat_Any_Patients_With_Special_Needs_IDDs	0	Count	10	9	19
		% within Treat_Any_Patients_With_Special_Needs_IDDs	0.526	0.474	1
	1	Count	27	10	37
		% within Treat_Any_Patients_With_Special_Needs_IDDs	0.73	0.27	1
Total		Count	37	19	56
		% within Treat_Any_Patients_With_Special_Needs_IDDs	0.661	0.339	1
Chi-Square Tests
	Value	df	Asymptotic Significance (2-sided)	Exact Sig. (2-sided)	Exact Sig. (1-sided)
Pearson Chi-Square	2.317a	1	0.128
Continuity Correctionb	1.499	1	0.221
Likelihood Ratio	2.275	1	0.131
Fisher's Exact Test				0.148	0.111
Linear-by-Linear Association	2.276	1	0.131
N of Valid Cases	56
a. 0 cells (0.0%) have expected count less than 5. The minimum expected count is 6.45.
b. Computed only for a 2x2 table
Crosstab
			I feel that the following types of educational materials would be helpful for individuals with Lowe syndrome. (Select all that apply) - Focus groups		Total
			0	1
Treat_Any_Patients_With_Special_Needs_IDDs	0	Count	12	7	19
		% within Treat_Any_Patients_With_Special_Needs_IDDs	0.632	0.368	1
	1	Count	28	9	37
		% within Treat_Any_Patients_With_Special_Needs_IDDs	0.757	0.243	1
Total		Count	40	16	56
		% within Treat_Any_Patients_With_Special_Needs_IDDs	0.714	0.286	1
Chi-Square Tests
	Value	df	Asymptotic Significance (2-sided)	Exact Sig. (2-sided)	Exact Sig. (1-sided)
Pearson Chi-Square	.964a	1	0.326
Continuity Correctionb	0.448	1	0.503
Likelihood Ratio	0.944	1	0.331
Fisher's Exact Test				0.362	0.249
Linear-by-Linear Association	0.947	1	0.331
N of Valid Cases	56
a. 0 cells (0.0%) have expected count less than 5. The minimum expected count is 5.43.
b. Computed only for a 2x2 table
Association between “treat any patients with special needs / IDDs” and Q13 (Mann-Whitney U test):
Treat_Any_Patients_With_Special_Needs_IDDs * In the next section of the survey, please provide your level of agreement with the following statements about potential educational materials to be given to patients with Lowe syndrome and their caregivers.I feel there is a need for more educational materials to help patients with Lowe syndrome in the dental setting. Crosstabulation
			In the next section of the survey, please provide your level of agreement with the following statements about potential educational materials to be given to patients with Lowe syndrome and their caregivers.I feel there is a need for more educational materials to help patients with Lowe syndrome in the dental setting.			Total
			1	2	3
Treat_Any_Patients_With_Special_Needs_IDDs	0	Count	7	6	6	19
		% within Treat_Any_Patients_With_Special_Needs_IDDs	0.368	0.316	0.316	1
	1	Count	18	16	5	39
		% within Treat_Any_Patients_With_Special_Needs_IDDs	0.462	0.41	0.128	1
Total		Count	25	22	11	58
		% within Treat_Any_Patients_With_Special_Needs_IDDs	0.431	0.379	0.19	1
Ranks
	Treat_Any_Patients_With_Special_Needs_IDDs	N	Mean Rank	Sum of Ranks
In the next section of the survey, please provide your level of agreement with the following statements about potential educational materials to be given to patients with Lowe syndrome and their caregivers.I feel there is a need for more educational materials to help patients with Lowe syndrome in the dental setting.	0	19	33.05	628
	1	39	27.77	1083
	Total	58
Test Statisticsa
	In the next section of the survey, please provide your level of agreement with the following statements about potential educational materials to be given to patients with Lowe syndrome and their caregivers.I feel there is a need for more educational materials to help patients with Lowe syndrome in the dental setting.
Mann-Whitney U	303
Wilcoxon W	1083
Z	-1.207
Asymp. Sig. (2-tailed)	0.228
a. Grouping Variable: Treat_Any_Patients_With_Special_Needs_IDDs
Association between “treat any patients with special needs / IDDs” and Q14 (Mann-Whitney U test):
Treat_Any_Patients_With_Special_Needs_IDDs * I feel there is a need for more educational materials to help patients with IDDs in general in the dental setting. Crosstabulation
			I feel there is a need for more educational materials to help patients with IDDs in general in the dental setting.			Total
			1	2	3
Treat_Any_Patients_With_Special_Needs_IDDs	0	Count	7	9	3	19
		% within Treat_Any_Patients_With_Special_Needs_IDDs	0.368	0.474	0.158	1
	1	Count	22	11	6	39
		% within Treat_Any_Patients_With_Special_Needs_IDDs	0.564	0.282	0.154	1
Total		Count	29	20	9	58
		% within Treat_Any_Patients_With_Special_Needs_IDDs	0.5	0.345	0.155	1
Ranks
	Treat_Any_Patients_With_Special_Needs_IDDs	N	Mean Rank	Sum of Ranks
I feel there is a need for more educational materials to help patients with IDDs in general in the dental setting.	0	19	32.76	622.5
	1	39	27.91	1088.5
	Total	58
Test Statisticsa
	I feel there is a need for more educational materials to help patients with IDDs in general in the dental setting.
Mann-Whitney U	308.5
Wilcoxon W	1088.5
Z	-1.127
Asymp. Sig. (2-tailed)	0.26
a. Grouping Variable: Treat_Any_Patients_With_Special_Needs_IDDs
Association between “treat any patients with special needs / IDDs” and Q16 (Mann-Whitney U test [those who answered “I am not aware of this feature” (option 6) for Q16 were excluded from the test]):
Treat_Any_Patients_With_Special_Needs_IDDs * I feel that it would be helpful to include a toothbrushing timer with a cartoon animation (similar to the Brush Hero phone app) on the Website/Mobile app. Crosstabulation
			I feel that it would be helpful to include a toothbrushing timer with a cartoon animation (similar to the Brush Hero phone app) on the Website/Mobile app.					Total
			1	2	3	4	6
Treat_Any_Patients_With_Special_Needs_IDDs	0	Count	6	8	1	1	2	18
		% within Treat_Any_Patients_With_Special_Needs_IDDs	0.333	0.444	0.056	0.056	0.111	1
	1	Count	10	15	5	0	7	37
		% within Treat_Any_Patients_With_Special_Needs_IDDs	0.27	0.405	0.135	0	0.189	1
Total		Count	16	23	6	1	9	55
		% within Treat_Any_Patients_With_Special_Needs_IDDs	0.291	0.418	0.109	0.018	0.164	1
Ranks
	Treat_Any_Patients_With_Special_Needs_IDDs	N	Mean Rank	Sum of Ranks
I feel that it would be helpful to include a toothbrushing timer with a cartoon animation (similar to the Brush Hero phone app) on the Website/Mobile app.	0	16	22.72	363.5
	1	30	23.92	717.5
	Total	46
Test Statisticsa
	I feel that it would be helpful to include a toothbrushing timer with a cartoon animation (similar to the Brush Hero phone app) on the Website/Mobile app.
Mann-Whitney U	227.5
Wilcoxon W	363.5
Z	-0.316
Asymp. Sig. (2-tailed)	0.752
a. Grouping Variable: Treat_Any_Patients_With_Special_Needs_IDDs
Association between “treat any patients with special needs / IDDs” and Q17 (Mann-Whitney U test [those who answered “I am not aware of this feature” (option 6) for Q17 were excluded from the test]):
Treat_Any_Patients_With_Special_Needs_IDDs * I feel that it would be helpful to include an access to care map/animation (similar to the ADAâ€™s Find A Dentist feature) on the website/mobile app. Crosstabulation
			I feel that it would be helpful to include an access to care map/animation (similar to the ADAâ€™s Find A Dentist feature) on the website/mobile app.				Total
			1	2	3	6
Treat_Any_Patients_With_Special_Needs_IDDs	0	Count	9	8	1	0	18
		% within Treat_Any_Patients_With_Special_Needs_IDDs	0.5	0.444	0.056	0	1
	1	Count	15	16	3	4	38
		% within Treat_Any_Patients_With_Special_Needs_IDDs	0.395	0.421	0.079	0.105	1
Total		Count	24	24	4	4	56
		% within Treat_Any_Patients_With_Special_Needs_IDDs	0.429	0.429	0.071	0.071	1
Ranks
	Treat_Any_Patients_With_Special_Needs_IDDs	N	Mean Rank	Sum of Ranks
I feel that it would be helpful to include an access to care map/animation (similar to the ADAâ€™s Find A Dentist feature) on the website/mobile app.	0	18	25.28	455
	1	34	27.15	923
	Total	52
Test Statisticsa
	I feel that it would be helpful to include an access to care map/animation (similar to the ADAâ€™s Find A Dentist feature) on the website/mobile app.
Mann-Whitney U	284
Wilcoxon W	455
Z	-0.472
Asymp. Sig. (2-tailed)	0.637
a. Grouping Variable: Treat_Any_Patients_With_Special_Needs_IDDs
Association between “treat any patients with special needs / IDDs” and Q18 (Mann-Whitney U test [those who answered “I am not aware of this method” (option 6) for Q18 were excluded from the test]):
Treat_Any_Patients_With_Special_Needs_IDDs * I feel that it would be helpful to include a video showing the tell-show-do method on the website/mobile app. Crosstabulation
			I feel that it would be helpful to include a video showing the tell-show-do method on the website/mobile app.				Total
			1	2	3	6
Treat_Any_Patients_With_Special_Needs_IDDs	0	Count	8	7	2	1	18
		% within Treat_Any_Patients_With_Special_Needs_IDDs	0.444	0.389	0.111	0.056	1
	1	Count	14	15	7	2	38
		% within Treat_Any_Patients_With_Special_Needs_IDDs	0.368	0.395	0.184	0.053	1
Total		Count	22	22	9	3	56
		% within Treat_Any_Patients_With_Special_Needs_IDDs	0.393	0.393	0.161	0.054	1
Ranks
	Treat_Any_Patients_With_Special_Needs_IDDs	N	Mean Rank	Sum of Ranks
I feel that it would be helpful to include a video showing the tell-show-do method on the website/mobile app.	0	17	24.97	424.5
	1	36	27.96	1006.5
	Total	53
Test Statisticsa
	I feel that it would be helpful to include a video showing the tell-show-do method on the website/mobile app.
Mann-Whitney U	271.5
Wilcoxon W	424.5
Z	-0.712
Asymp. Sig. (2-tailed)	0.476
a. Grouping Variable: Treat_Any_Patients_With_Special_Needs_IDDs
Association between “treat any patients with special needs / IDDs” and Q19 (Mann-Whitney U test):
Treat_Any_Patients_With_Special_Needs_IDDs * I feel that video instructions would be helpful in simulating the dental experience for patients with Lowe syndrome. Crosstabulation
			I feel that video instructions would be helpful in simulating the dental experience for patients with Lowe syndrome.			Total
			1	2	3
Treat_Any_Patients_With_Special_Needs_IDDs	0	Count	7	9	2	18
		% within Treat_Any_Patients_With_Special_Needs_IDDs	0.389	0.5	0.111	1
	1	Count	11	21	6	38
		% within Treat_Any_Patients_With_Special_Needs_IDDs	0.289	0.553	0.158	1
Total		Count	18	30	8	56
		% within Treat_Any_Patients_With_Special_Needs_IDDs	0.321	0.536	0.143	1
Ranks
	Treat_Any_Patients_With_Special_Needs_IDDs	N	Mean Rank	Sum of Ranks
I feel that video instructions would be helpful in simulating the dental experience for patients with Lowe syndrome.	0	18	26.28	473
	1	38	29.55	1123
	Total	56
Test Statisticsa
	I feel that video instructions would be helpful in simulating the dental experience for patients with Lowe syndrome.
Mann-Whitney U	302
Wilcoxon W	473
Z	-0.78
Asymp. Sig. (2-tailed)	0.436
a. Grouping Variable: Treat_Any_Patients_With_Special_Needs_IDDs
Association between “treat any patients with special needs / IDDs” and Q20 (Mann-Whitney U test):
Treat_Any_Patients_With_Special_Needs_IDDs * I feel that pamphlets answering frequently asked questions would be helpful for patients with Lowe syndrome. Crosstabulation
			I feel that pamphlets answering frequently asked questions would be helpful for patients with Lowe syndrome.				Total
			1	2	3	5
Treat_Any_Patients_With_Special_Needs_IDDs	0	Count	8	7	2	0	17
		% within Treat_Any_Patients_With_Special_Needs_IDDs	0.471	0.412	0.118	0	1
	1	Count	17	15	5	1	38
		% within Treat_Any_Patients_With_Special_Needs_IDDs	0.447	0.395	0.132	0.026	1
Total		Count	25	22	7	1	55
		% within Treat_Any_Patients_With_Special_Needs_IDDs	0.455	0.4	0.127	0.018	1
Ranks
	Treat_Any_Patients_With_Special_Needs_IDDs	N	Mean Rank	Sum of Ranks
I feel that pamphlets answering frequently asked questions would be helpful for patients with Lowe syndrome.	0	17	27.15	461.5
	1	38	28.38	1078.5
	Total	55
Test Statisticsa
	I feel that pamphlets answering frequently asked questions would be helpful for patients with Lowe syndrome.
Mann-Whitney U	308.5
Wilcoxon W	461.5
Z	-0.288
Asymp. Sig. (2-tailed)	0.773
a. Grouping Variable: Treat_Any_Patients_With_Special_Needs_IDDs
Associations between “specialist” and “reasons why you may not be able to treat a person with Lowe syndrome” (chi-square test or Fisher’s exact test):
Crosstab
			Which of the reasons below align with why you may not be able to treat a person with Lowe syndrome? (Select all that apply) - Selected Choice - Do not have experience in treating children with special needs		Total
			0	1
Specialist	0	Count	20	15	35
		% within Specialist	0.571	0.429	1
	1	Count	22	4	26
		% within Specialist	0.846	0.154	1
Total		Count	42	19	61
		% within Specialist	0.689	0.311	1
Chi-Square Tests
	Value	df	Asymptotic Significance (2-sided)	Exact Sig. (2-sided)	Exact Sig. (1-sided)
Pearson Chi-Square	5.250a	1	0.022
Continuity Correctionb	4.047	1	0.044
Likelihood Ratio	5.545	1	0.019
Fisher's Exact Test				0.027	0.02
Linear-by-Linear Association	5.164	1	0.023
N of Valid Cases	61
a. 0 cells (0.0%) have expected count less than 5. The minimum expected count is 8.10.
b. Computed only for a 2x2 table
Crosstab
			Which of the reasons below align with why you may not be able to treat a person with Lowe syndrome? (Select all that apply) - Selected Choice - Do not accept medical assistance, like Medicaid/Medicare		Total
			0	1
Specialist	0	Count	24	11	35
		% within Specialist	0.686	0.314	1
	1	Count	18	8	26
		% within Specialist	0.692	0.308	1
Total		Count	42	19	61
		% within Specialist	0.689	0.311	1
Chi-Square Tests
	Value	df	Asymptotic Significance (2-sided)	Exact Sig. (2-sided)	Exact Sig. (1-sided)
Pearson Chi-Square	.003a	1	0.956
Continuity Correctionb	0	1	1
Likelihood Ratio	0.003	1	0.956
Fisher's Exact Test				1	0.591
Linear-by-Linear Association	0.003	1	0.957
N of Valid Cases	61
a. 0 cells (0.0%) have expected count less than 5. The minimum expected count is 8.10.
b. Computed only for a 2x2 table
Crosstab
			Which of the reasons below align with why you may not be able to treat a person with Lowe syndrome? (Select all that apply) - Selected Choice - Requires a multidisciplinary approach		Total
			0	1
Specialist	0	Count	30	5	35
		% within Specialist	0.857	0.143	1
	1	Count	20	6	26
		% within Specialist	0.769	0.231	1
Total		Count	50	11	61
		% within Specialist	0.82	0.18	1
Chi-Square Tests
	Value	df	Asymptotic Significance (2-sided)	Exact Sig. (2-sided)	Exact Sig. (1-sided)
Pearson Chi-Square	.780a	1	0.377
Continuity Correctionb	0.299	1	0.585
Likelihood Ratio	0.772	1	0.38
Fisher's Exact Test				0.504	0.291
Linear-by-Linear Association	0.767	1	0.381
N of Valid Cases	61
a. 1 cells (25.0%) have expected count less than 5. The minimum expected count is 4.69.
b. Computed only for a 2x2 table
Crosstab
			Which of the reasons below align with why you may not be able to treat a person with Lowe syndrome? (Select all that apply) - Selected Choice - Dental office not properly equipped		Total
			0	1
Specialist	0	Count	28	7	35
		% within Specialist	0.8	0.2	1
	1	Count	22	4	26
		% within Specialist	0.846	0.154	1
Total		Count	50	11	61
		% within Specialist	0.82	0.18	1
Chi-Square Tests
	Value	df	Asymptotic Significance (2-sided)	Exact Sig. (2-sided)	Exact Sig. (1-sided)
Pearson Chi-Square	.215a	1	0.643
Continuity Correctionb	0.016	1	0.899
Likelihood Ratio	0.218	1	0.641
Fisher's Exact Test				0.745	0.454
Linear-by-Linear Association	0.211	1	0.646
N of Valid Cases	61
a. 1 cells (25.0%) have expected count less than 5. The minimum expected count is 4.69.
b. Computed only for a 2x2 table
Crosstab
			Which of the reasons below align with why you may not be able to treat a person with Lowe syndrome? (Select all that apply) - Selected Choice - Other: Please explain _________		Total
			0	1
Specialist	0	Count	28	7	35
		% within Specialist	0.8	0.2	1
	1	Count	19	7	26
		% within Specialist	0.731	0.269	1
Total		Count	47	14	61
		% within Specialist	0.77	0.23	1
Chi-Square Tests
	Value	df	Asymptotic Significance (2-sided)	Exact Sig. (2-sided)	Exact Sig. (1-sided)
Pearson Chi-Square	.404a	1	0.525
Continuity Correctionb	0.108	1	0.743
Likelihood Ratio	0.401	1	0.526
Fisher's Exact Test				0.553	0.369
Linear-by-Linear Association	0.398	1	0.528
N of Valid Cases	61
a. 0 cells (0.0%) have expected count less than 5. The minimum expected count is 5.97.
b. Computed only for a 2x2 table
Associations between “21+ years of dental experience” and “reasons why you may not be able to treat a person with Lowe syndrome” (chi-square test or Fisher’s exact test):
Crosstab
			Which of the reasons below align with why you may not be able to treat a person with Lowe syndrome? (Select all that apply) - Selected Choice - Do not have experience in treating children with special needs		Total
			0	1
Over_20_Years_Dental_Experience	0	Count	20	0	20
		% within Over_20_Years_Dental_Experience	1	0	1
	1	Count	21	19	40
		% within Over_20_Years_Dental_Experience	0.525	0.475	1
Total		Count	41	19	60
		% within Over_20_Years_Dental_Experience	0.683	0.317	1
Chi-Square Tests
	Value	df	Asymptotic Significance (2-sided)	Exact Sig. (2-sided)	Exact Sig. (1-sided)
Pearson Chi-Square	13.902a	1	<.001
Continuity Correctionb	11.794	1	<.001
Likelihood Ratio	19.568	1	<.001
Fisher's Exact Test				<.001	<.001
Linear-by-Linear Association	13.671	1	<.001
N of Valid Cases	60
a. 0 cells (0.0%) have expected count less than 5. The minimum expected count is 6.33.
b. Computed only for a 2x2 table
Crosstab
			Which of the reasons below align with why you may not be able to treat a person with Lowe syndrome? (Select all that apply) - Selected Choice - Do not accept medical assistance, like Medicaid/Medicare		Total
			0	1
Over_20_Years_Dental_Experience	0	Count	13	7	20
		% within Over_20_Years_Dental_Experience	0.65	0.35	1
	1	Count	28	12	40
		% within Over_20_Years_Dental_Experience	0.7	0.3	1
Total		Count	41	19	60
		% within Over_20_Years_Dental_Experience	0.683	0.317	1
Chi-Square Tests
	Value	df	Asymptotic Significance (2-sided)	Exact Sig. (2-sided)	Exact Sig. (1-sided)
Pearson Chi-Square	.154a	1	0.695
Continuity Correctionb	0.01	1	0.922
Likelihood Ratio	0.153	1	0.696
Fisher's Exact Test				0.772	0.456
Linear-by-Linear Association	0.151	1	0.697
N of Valid Cases	60
a. 0 cells (0.0%) have expected count less than 5. The minimum expected count is 6.33.
b. Computed only for a 2x2 table
Crosstab
			Which of the reasons below align with why you may not be able to treat a person with Lowe syndrome? (Select all that apply) - Selected Choice - Requires a multidisciplinary approach		Total
			0	1
Over_20_Years_Dental_Experience	0	Count	15	5	20
		% within Over_20_Years_Dental_Experience	0.75	0.25	1
	1	Count	34	6	40
		% within Over_20_Years_Dental_Experience	0.85	0.15	1
Total		Count	49	11	60
		% within Over_20_Years_Dental_Experience	0.817	0.183	1
Chi-Square Tests
	Value	df	Asymptotic Significance (2-sided)	Exact Sig. (2-sided)	Exact Sig. (1-sided)
Pearson Chi-Square	.891a	1	0.345
Continuity Correctionb	0.348	1	0.555
Likelihood Ratio	0.859	1	0.354
Fisher's Exact Test				0.481	0.273
Linear-by-Linear Association	0.876	1	0.349
N of Valid Cases	60
a. 1 cells (25.0%) have expected count less than 5. The minimum expected count is 3.67.
b. Computed only for a 2x2 table
Crosstab
			Which of the reasons below align with why you may not be able to treat a person with Lowe syndrome? (Select all that apply) - Selected Choice - Dental office not properly equipped		Total
			0	1
Over_20_Years_Dental_Experience	0	Count	16	4	20
		% within Over_20_Years_Dental_Experience	0.8	0.2	1
	1	Count	33	7	40
		% within Over_20_Years_Dental_Experience	0.825	0.175	1
Total		Count	49	11	60
		% within Over_20_Years_Dental_Experience	0.817	0.183	1
Chi-Square Tests
	Value	df	Asymptotic Significance (2-sided)	Exact Sig. (2-sided)	Exact Sig. (1-sided)
Pearson Chi-Square	.056a	1	0.813
Continuity Correctionb	0	1	1
Likelihood Ratio	0.055	1	0.814
Fisher's Exact Test				1	0.536
Linear-by-Linear Association	0.055	1	0.815
N of Valid Cases	60
a. 1 cells (25.0%) have expected count less than 5. The minimum expected count is 3.67.
b. Computed only for a 2x2 table
[truncated: 211 more rows]
